# Supplementary material for: The Great Majority of Homologous Recombination Repair-Deficient Tumors Are Accounted for by Established Causes
Source: Front Genet. 2022 Jun 17;13:852159. doi: 10.3389/fgene.2022.852159 (PMC9247292; doi:10.3389/fgene.2022.852159)
Supplement: Supplementary file 2 [file DataSheet2.xlsx]

## Sheet: Suplementary_table_1
sample	p_hrdetect	p_chord	HRD_type	BRCA1	BRCA2	PALB2	RAD51B	RAD51C	XRCC2	moallelic_gene	motype_origin	literature	Any_event	cancer_type
PD10014	0.990331347	0.558	BRCA1_type	Germline								Davies et al. (2017)	True	Breast
PD11327	0.676265971	0.1		Germline								Davies et al. (2017)	True	Breast
PD11742	0.999566437	0.894	BRCA1_type	Somatic								Davies et al. (2017)	True	Breast
PD11748	0.992352968	0.364		Promoter hypermethylation								Davies et al. (2017)	True	Breast
PD11750	0.794349042	0.092		Promoter hypermethylation								Davies et al. (2017)	True	Breast
PD11751	0.999958507	0.938	BRCA1_type	Promoter hypermethylation								Davies et al. (2017)	True	Breast
PD11755	0.697850198	0.166		Promoter hypermethylation								Davies et al. (2017)	True	Breast
PD13296	0.99980996	0.892	BRCA1_type	Germline								Davies et al. (2017)	True	Breast
PD13297	0.999527229	0.816	BRCA1_type	Germline								Davies et al. (2017)	True	Breast
PD13299	0.999951549	0.808	BRCA1_type	Germline								Davies et al. (2017)	True	Breast
PD13311	0.836809757	0.2		Promoter hypermethylation								Davies et al. (2017)	True	Breast
PD13627	0.999447305	0.894	BRCA1_type	Germline								Davies et al. (2017)	True	Breast
PD13771	0.988608528	0.694	BRCA2_type	Germline								Davies et al. (2017)	True	Breast
PD18259	0.952841429	0.716	BRCA2_type		Germline							Davies et al. (2017)	True	Breast
PD22355	0.999053508	0.928	BRCA1_type	Germline								Davies et al. (2017)	True	Breast
PD22358	0.891588287	0.766	BRCA2_type		Germline							Davies et al. (2017)	True	Breast
PD23558	0.986002264	0.82	BRCA2_type		Germline							Davies et al. (2017)	True	Breast
PD23562	0.999806055	0.91	BRCA1_type	Germline								Davies et al. (2017)	True	Breast
PD23574	0.998036233	0.866	BRCA1_type	Germline								Davies et al. (2017)	True	Breast
PD23578	0.985107256	0.598	BRCA1_type	Germline								Davies et al. (2017)	True	Breast
PD24186	0.772535385	0.034		Germline								Davies et al. (2017)	True	Breast
PD24191	0.815811294	0.702	BRCA2_type		Germline							Davies et al. (2017)	True	Breast
PD24202	0.997813503	0.93	BRCA1_type	Germline								Davies et al. (2017)	True	Breast
PD24337	0.999810471	0.924	BRCA1_type	Germline								Davies et al. (2017)	True	Breast
PD4006	0.998755702	0.914	BRCA1_type	Germline								Davies et al. (2017)	True	Breast
PD4872	0.967031649	0.7	BRCA2_type		Germline							Davies et al. (2017)	True	Breast
PD4874	0.984994667	0.758	BRCA2_type		Germline							Davies et al. (2017)	True	Breast
PD4876	0.995923355	0.778	BRCA2_type		Germline							Davies et al. (2017)	True	Breast
PD4951	0.925866464	0.842	BRCA2_type		Germline							Davies et al. (2017)	True	Breast
PD4952	0.998831157	0.854	BRCA2_type		Germline							Davies et al. (2017)	True	Breast
PD4955	0.998253626	0.788	BRCA2_type		Germline							Davies et al. (2017)	True	Breast
PD4956	0.999975508	0.882	BRCA1_type		Germline							Davies et al. (2017)	True	Breast
PD4957	0.864465956	0.714	BRCA2_type		Germline							Davies et al. (2017)	True	Breast
PD4958	0.975634433	0.716	BRCA2_type		Germline							Davies et al. (2017)	True	Breast
PD5930	0.993966436	0.57	BRCA1_type	Germline								Davies et al. (2017)	True	Breast
PD5935	0.999458909	0.912	BRCA1_type	Germline								Davies et al. (2017)	True	Breast
PD5945	0.9999843	0.942	BRCA1_type	Germline								Davies et al. (2017)	True	Breast
PD5948	0.999952408	0.906	BRCA1_type	Germline								Davies et al. (2017)	True	Breast
PD5960	0.826113083	0.704	BRCA2_type		Somatic							Davies et al. (2017)	True	Breast
PD6406	0.973711777	0.344		Germline								Davies et al. (2017)	True	Breast
PD6413	0.997920551	0.896	BRCA1_type	Germline								Davies et al. (2017)	True	Breast
PD6684	0.999770565	0.836	BRCA1_type	Promoter hypermethylation								Davies et al. (2017)	True	Breast
PD6731	0.989246214	0.526	BRCA1_type	Germline								Davies et al. (2017)	True	Breast
PD7211	0.998946274	0.936	BRCA1_type	Promoter hypermethylation								Davies et al. (2017)	True	Breast
PD7217	0.967663635	0.746	BRCA2_type		Germline							Davies et al. (2017)	True	Breast
PD7250	0.999945947	0.914	BRCA1_type	Promoter hypermethylation								Davies et al. (2017)	True	Breast
PD8610	0.979266653	0.716	BRCA2_type		Germline							Davies et al. (2017)	True	Breast
PD8611	0.999889387	0.894	BRCA1_type	Promoter hypermethylation								Davies et al. (2017)	True	Breast
PD8621	0.999733563	0.926	BRCA1_type	Germline								Davies et al. (2017)	True	Breast
PD8652	0.997897581	0.492		Promoter hypermethylation								Davies et al. (2017)	True	Breast
PD8832	0.997044177	0.728	BRCA1_type		Germline							Davies et al. (2017)	True	Breast
PD8969	0.992815414	0.686	BRCA2_type		Germline							Davies et al. (2017)	True	Breast
PD8978	0.969161583	0.778	BRCA2_type		Somatic							Davies et al. (2017)	True	Breast
PD8980	0.99911656	0.83	BRCA1_type	Germline								Davies et al. (2017)	True	Breast
PD8984	0.994745447	0.706	BRCA2_type		Somatic							Davies et al. (2017)	True	Breast
PD9004	0.998114843	0.858	BRCA1_type	Germline								Davies et al. (2017)	True	Breast
PD9585	0.999928591	0.89	BRCA1_type	Somatic								Davies et al. (2017)	True	Breast
PD9702	0.88336467	0.266		Germline								Davies et al. (2017)	True	Breast
53bcbb68-addd-47fc-9910-cd1d3f38197d	0.84164684	0.086		Somatic								Davies et al. (2017)	True	Ovary
PD4107	0.999544865	0.892	BRCA1_type	Germline								Davies et al. (2017);Nguyen et al. (2020)	True	Breast
PD3890	0.999980853	0.93	BRCA1_type	Germline								Davies et al. (2017);Nguyen et al. (2020)	True	Breast
PD3904	0.999750012	0.822	BRCA2_type		Germline							Davies et al. (2017);Nguyen et al. (2020)	True	Breast
PD3945	0.999675304	0.858	BRCA2_type		Germline							Davies et al. (2017);Nguyen et al. (2020)	True	Breast
PD3905	0.999910686	0.92	BRCA1_type	Germline								Davies et al. (2017);Nguyen et al. (2020)	True	Breast
PD4005	0.999975904	0.826	BRCA1_type	Germline								Davies et al. (2017);Nguyen et al. (2020)	True	Breast
PD4116	0.999152507	0.792	BRCA2_type		Germline							Davies et al. (2017);Nguyen et al. (2020)	True	Breast
PD4115	0.999533931	0.86	BRCA2_type		Germline							Davies et al. (2017);Nguyen et al. (2020)	True	Breast
PD4959	0.999043139	0.844	BRCA2_type		Germline							Davies et al. (2017);Nguyen et al. (2020)	True	Breast
PD9592	0.999953765	0.94	BRCA1_type	Promoter hypermethylation								Davies et al. (2017);Nguyen et al. (2020)	True	Breast
PD4954	0.999305088	0.82	BRCA2_type		Germline							Davies et al. (2017);Nguyen et al. (2020)	True	Breast
PD4953	0.998523385	0.83	BRCA2_type		Germline							Davies et al. (2017);Nguyen et al. (2020)	True	Breast
PD7215	0.999474127	0.834	BRCA1_type	Somatic								Davies et al. (2017);Nguyen et al. (2020)	True	Breast
PD6042	0.996750311	0.756	BRCA2_type		Somatic							Davies et al. (2017);Nguyen et al. (2020)	True	Breast
PD4604	0.999637848	0.862	BRCA2_type		Germline							Davies et al. (2017);Nguyen et al. (2020)	True	Breast
PD9000	0.999472746	0.842	BRCA2_type		Somatic							Davies et al. (2017);Nguyen et al. (2020)	True	Breast
PD6409	0.999843844	0.884	BRCA1_type	Promoter hypermethylation								Davies et al. (2017);Nguyen et al. (2020)	True	Breast
PD6411	0.999896508	0.924	BRCA1_type	Promoter hypermethylation								Davies et al. (2017);Nguyen et al. (2020)	True	Breast
PD6415	0.999955516	0.912	BRCA1_type	Promoter hypermethylation								Davies et al. (2017);Nguyen et al. (2020)	True	Breast
f6c811ff-f22e-490b-9b23-b527d20e6e6d	0.999871399	0.914	BRCA1_type	Promoter hypermethylation								Davies et al. (2017);Nguyen et al. (2020)	True	Ovary
efec3225-de07-4559-9a90-95223495cc61	0.999985887	0.924	BRCA1_type	Germline								Davies et al. (2017);Nguyen et al. (2020)	True	Ovary
6f981023-4269-4e8e-a4ab-2c92bb27273c	0.999889333	0.914	BRCA1_type	Germline								Davies et al. (2017);Nguyen et al. (2020)	True	Ovary
efbec43c-0c16-4006-abe8-c3ec2ec42c05	0.999455342	0.854	BRCA2_type		Somatic							Davies et al. (2017);Nguyen et al. (2020)	True	Ovary
a3135834-3af0-4e98-bc6f-ad8ddf33db80	0.999970636	0.902	BRCA1_type	Promoter hypermethylation								Davies et al. (2017);Nguyen et al. (2020)	True	Ovary
2b4feb84-89e4-4c38-8561-5ffab02c8132	0.999669232	0.946	BRCA1_type	Germline								Davies et al. (2017);Nguyen et al. (2020)	True	Ovary
42465bbd-289b-4e96-98fe-76809c5e1520	0.996703298	0.864	BRCA1_type	Somatic								Davies et al. (2017);Nguyen et al. (2020)	True	Ovary
e84debc4-b47d-48ed-a0d0-2859f0ebf987	0.999684077	0.906	BRCA1_type	Somatic								Davies et al. (2017);Nguyen et al. (2020)	True	Ovary
f988e698-9b34-45ce-ba4c-74e06e9cae4a	0.999897284	0.936	BRCA1_type	Germline								Davies et al. (2017);Nguyen et al. (2020)	True	Ovary
0d0793c1-df1b-4db1-ba36-adcb960cc0f5	0.99998442	0.932	BRCA1_type	Promoter hypermethylation								Davies et al. (2017);Nguyen et al. (2020)	True	Ovary
669f0e01-28f6-4ed8-bdb5-73f84ea28f78	0.999986761	0.918	BRCA1_type	Promoter hypermethylation								Davies et al. (2017);Nguyen et al. (2020)	True	Ovary
c767254e-b289-4904-a80f-050cf01ff8ba	0.999986008	0.908	BRCA1_type	Promoter hypermethylation								Davies et al. (2017);Nguyen et al. (2020)	True	Ovary
51b25b37-f75c-4380-a0f6-5273e0b7ee33	0.999936024	0.936	BRCA1_type	Germline								Davies et al. (2017);Nguyen et al. (2020)	True	Ovary
b75b2663-dcc6-411c-bfcc-574aa33cf388	0.999006139	0.852	BRCA2_type		Germline							Davies et al. (2017);Nguyen et al. (2020)	True	Ovary
2b40a733-7a63-4bb8-a953-95a4ee28f962	0.999683137	0.94	BRCA1_type	Germline								Davies et al. (2017);Nguyen et al. (2020)	True	Ovary
cf6c7066-6611-43ec-aef1-295a976cce5b	0.999922288	0.858	BRCA1_type	Somatic				Promoter hypermethylation				Davies et al. (2017);Nguyen et al. (2020)	True	Ovary
d2e4dc23-992d-4e44-add4-2972718083cb	0.999944924	0.942	BRCA1_type	Promoter hypermethylation								Davies et al. (2017);Nguyen et al. (2020)	True	Ovary
d4bf6034-aeae-48a6-907b-10e2cc904015	0.999876157	0.942	BRCA1_type	Germline								Davies et al. (2017);Nguyen et al. (2020)	True	Ovary
d8c2b4b2-e12b-43d2-bafc-87b29f027797	0.999997935	0.944	BRCA1_type	Germline								Davies et al. (2017);Nguyen et al. (2020)	True	Ovary
f26b1f44-12de-43ba-85bb-bc61741a5a88	0.999857117	0.926	BRCA1_type	Promoter hypermethylation								Davies et al. (2017);Nguyen et al. (2020)	True	Ovary
bc9b66f5-fcb8-4545-ab2d-438bb810edc0	0.999918718	0.932	BRCA1_type	Germline								Davies et al. (2017);Nguyen et al. (2020)	True	Ovary
da43386c-47f8-4e03-b6ca-8b94e13792e7	0.999947861	0.952	BRCA1_type	Germline								Davies et al. (2017);Nguyen et al. (2020)	True	Ovary
8888e808-594b-4c76-b2e4-62aa56736f7c	0.999954343	0.944	BRCA1_type	Germline								Davies et al. (2017);Nguyen et al. (2020)	True	Ovary
c2ec7f57-8510-4bbf-a2e9-dbd9ce8dcad1	0.999969139	0.852	BRCA2_type		Germline							Davies et al. (2017);Nguyen et al. (2020)	True	Ovary
9e6806c4-d331-4025-abee-2f576e3bf182	0.999976602	0.842	BRCA2_type		Somatic							Davies et al. (2017);Nguyen et al. (2020)	True	Ovary
4679f37a-4f09-449b-a1d8-1f02847996da	0.999978303	0.948	BRCA1_type	Promoter hypermethylation								Davies et al. (2017);Nguyen et al. (2020)	True	Ovary
dce54d09-9827-4fe2-abe1-c5b7d528ba7f	0.999932778	0.914	BRCA1_type	Promoter hypermethylation								Davies et al. (2017);Nguyen et al. (2020)	True	Ovary
dbbd54db-4470-4df6-b5be-3e175c7133b0	0.999965926	0.852	BRCA2_type		Germline							Davies et al. (2017);Nguyen et al. (2020)	True	Ovary
f6189828-eeaa-4d21-b163-53bf3d47a640	0.9995135	0.928	BRCA1_type	Somatic								Davies et al. (2017);Nguyen et al. (2020)	True	Ovary
ASHPC_0025_Pa_P	0.99961358	0.76	BRCA2_type					Deep deletion				Golan et al. (2021)	True	Pancreas
PCSI_0015_Pa_P_526	0.99999845	0.858	BRCA1_type	Somatic								Golan et al. (2021)	True	Pancreas
PCSI_0017_Pa_X_526	0.999892949	0.89	BRCA2_type		Germline							Golan et al. (2021)	True	Pancreas
PCSI_0048_Pa_P_526	0.999973963	0.946	BRCA2_type		Germline							Golan et al. (2021)	True	Pancreas
PCSI_0075_Pa_P_526	0.999988836	0.872	BRCA1_type		Somatic							Golan et al. (2021)	True	Pancreas
PCSI_0142_Pa_P_526	0.999935216	0.92	BRCA2_type		Germline		Somatic					Golan et al. (2021)	True	Pancreas
PCSI_0176_Pa_X_526	0.999999889	0.948	BRCA1_type	Germline			Somatic					Golan et al. (2021)	True	Pancreas
PCSI_0218_Pa_P_526	0.999996131	0.944	BRCA2_type		Germline							Golan et al. (2021)	True	Pancreas
PCSI_0292_Pa_P_526	0.025302451	0.004			Germline					BRCA1	sNS	Golan et al. (2021)	True	Pancreas
PCSI_0309_Pa_P_526	0.022314092	0			Germline							Golan et al. (2021)	True	Pancreas
PCSI_0310_Pa_P_526	0.999621548	0.152		Germline								Golan et al. (2021)	True	Pancreas
PCSI_0355_Pa_P_526	0.006345004	0						Somatic				Golan et al. (2021)	True	Pancreas
PCSI_0472_Pa_P_526	0.999991562	0.814	BRCA2_type		Somatic							Golan et al. (2021)	True	Pancreas
PCSI_0475_Pa_P_526	0.999924598	0.976	BRCA2_type		Germline							Golan et al. (2021)	True	Pancreas
PCSI_0476_Pa_P_526	0.999998467	0.94	BRCA1_type	Germline						PALB2	sNS	Golan et al. (2021)	True	Pancreas
PCSI_0477_Pa_P_526	0.999994318	0.92	BRCA2_type		Germline							Golan et al. (2021)	True	Pancreas
PCSI_0490_Lv_X_526	0.999904959	0.906	BRCA2_type		Germline							Golan et al. (2021)	True	Pancreas
PCSI_0492_Pa_P_526	0.998255201	0.972	BRCA2_type		Germline							Golan et al. (2021)	True	Pancreas
PCSI_0547_Ab_M	0.999990398	0.922	BRCA2_type		Germline							Golan et al. (2021)	True	Pancreas
PCSI_0621_Lv_X_526	0.99991501	0.72	BRCA2_type		Germline							Golan et al. (2021)	True	Pancreas
PCSI_0657_As_X_526	0.999980275	0.908	BRCA2_type		Germline							Golan et al. (2021)	True	Pancreas
PCSI_0658_Lv_X_526	0.99999925	0.934	BRCA1_type	Germline			Somatic					Golan et al. (2021)	True	Pancreas
PCSI_0677_Pa_P_526	0.999996091	0.82	BRCA1_type	Germline								Golan et al. (2021)	True	Pancreas
PCSI_0681_Lv_M	0.999814255	0.964	BRCA2_type		Germline							Golan et al. (2021)	True	Pancreas
PCSI_0683_Pa_P_526head	0.99994773	0.946	BRCA2_type			Germline						Golan et al. (2021)	True	Pancreas
PCSI_0689_Lv_M	0.999956567	0.938	BRCA2_type		Germline					BRCA1	gFS	Golan et al. (2021)	True	Pancreas
PCSI_0703_Lv_M_526	0.999998871	0.914	BRCA1_type	Germline								Golan et al. (2021)	True	Pancreas
PCSI_0706_Pa_P_526	0.999999744	0.926	BRCA2_type		Germline							Golan et al. (2021)	True	Pancreas
PCSI_0710_Pa_P_526	0.999997706	0.96	BRCA2_type		Germline							Golan et al. (2021)	True	Pancreas
PCSI_0716_Pa_P_526	0.741603497	0.778	cant_be_determined			Germline						Golan et al. (2021)	True	Pancreas
PCSI_0735_Pa_P_526	0.999975258	0.894	BRCA2_type				Deep deletion	Deep deletion				Golan et al. (2021)	True	Pancreas
PCSI_0759_Lv_M_526	0.999474365	0.906	BRCA2_type		Deep deletion							Golan et al. (2021)	True	Pancreas
PCSI_0779_Pa_P	0.995873757	0.282			Germline					BRCA1	sNS	Golan et al. (2021)	True	Pancreas
PCSI_0781_Lv_M_526	0.999650392	0.938	BRCA2_type		Germline				Somatic			Golan et al. (2021)	True	Pancreas
PCSI_0786_Lv_X_526	0.99999501	0.834	BRCA1_type	Germline								Golan et al. (2021)	True	Pancreas
PCSI_0787_Lv_X_526	0.999260231	0.876	BRCA2_type		Germline							Golan et al. (2021)	True	Pancreas
PCSI_0788_Pa_X_526	0.999935538	0.75	BRCA2_type		Somatic							Golan et al. (2021)	True	Pancreas
PCSI_0789_Lv_X_526	0.999922397	0.886	BRCA2_type		Germline					RAD51B	sSV	Golan et al. (2021)	True	Pancreas
PCSI_0792_Om_M_526	0.999801456	0.954	BRCA2_type		Germline							Golan et al. (2021)	True	Pancreas
PCSI_0793_As_X_526	0.998071124	0.172			Somatic							Golan et al. (2021)	True	Pancreas
PCSI_0798_Pa_P_526	0.002312011	0		Somatic								Golan et al. (2021)	True	Pancreas
PCSI_0802_Lv_M_526	0.999987862	0.192		Germline								Golan et al. (2021)	True	Pancreas
PCSI_0936_Lv_M_526	0.999995334	0.694	BRCA1_type	Germline								Golan et al. (2021)	True	Pancreas
PCSI_0984_Lv_M_526	0.999968893	0.942	BRCA2_type		Germline			Somatic		RAD51B	sSV	Golan et al. (2021)	True	Pancreas
PCSI_1015_Lv_M_526	0.999945621	0.35		Germline								Golan et al. (2021)	True	Pancreas
PCSI_1017_Lv_M_526	0.999942134	0.972	BRCA2_type			Germline						Golan et al. (2021)	True	Pancreas
PCSI_1028_Lv_M_526	0.999953287	0.254						Somatic		RAD51B	sSV	Golan et al. (2021)	True	Pancreas
PCSI_1030_Pm_M_526	0.999914483	0.142		Germline								Golan et al. (2021)	True	Pancreas
PCSI_1032_Pa_X_526	0.99968075	0.85	BRCA2_type		Germline							Golan et al. (2021)	True	Pancreas
PCSI_1034_Lv_X_526	0.999966687	0.128		Somatic								Golan et al. (2021)	True	Pancreas
PCSI_1062_Lv_M_526	0.99997577	0.962	BRCA2_type		Germline							Golan et al. (2021)	True	Pancreas
PCSI_1068_Lv_M_526	0.997980365	0.448							Deep deletion			Golan et al. (2021)	True	Pancreas
PCSI_1071_Om_M_526	0.999988846	0.972	BRCA2_type		Germline							Golan et al. (2021)	True	Pancreas
RAMP_0002_Lv_M_526	0.98445349	0.014		Somatic			Deep deletion					Golan et al. (2021)	True	Pancreas
RAMP_0006_Lv_M_526	0.999984518	0.94	BRCA2_type			Germline						Golan et al. (2021)	True	Pancreas
ASHPC_0007_Pa_P	0.044030712	0								RAD51B	sSV	Golan et al. (2021)		Pancreas
PCSI_0101_Pa_P_526	0.001986068	0					Somatic					Golan et al. (2021)		Pancreas
PCSI_0107_Pa_P_526	0.006979078	0								BRCA2	sNS	Golan et al. (2021)		Pancreas
PCSI_0146_Pa_P_526	0.023074013	0								XRCC2	sSP	Golan et al. (2021)		Pancreas
PCSI_0274_Pa_P_526	0.022392264	0								RAD51B	sSV	Golan et al. (2021)		Pancreas
PCSI_0329_Pa_P_526	0.003928813	0								BRCA2	sSV	Golan et al. (2021)		Pancreas
PCSI_0339_Pa_P_526	0.013915104	0								BRCA2	sSV	Golan et al. (2021)		Pancreas
PCSI_0521_Pa_P_526	0.00104643	0								RAD51B	gFS	Golan et al. (2021)		Pancreas
PCSI_0529_Pa_P_526	0.025300003	0								RAD51D	sSV	Golan et al. (2021)		Pancreas
PCSI_0537_Pa_P_526	0.028737096	0.002								BRCA1	sNS	Golan et al. (2021)		Pancreas
PCSI_0600_Lv_X_5261	0.013676228	0								BRCA1	gFS	Golan et al. (2021)		Pancreas
PCSI_0607_Lv_X	0.999996477	0.934	BRCA1_type				Somatic					Golan et al. (2021)		Pancreas
PCSI_0613_Pa_P_526	0.754943853	0.002								PALB2	sNS	Golan et al. (2021)		Pancreas
PCSI_0624_Pa_P_526	0.005064089	0								BRCA1	sSV	Golan et al. (2021)		Pancreas
PCSI_0688_As_X_526	0.002681652	0								BRCA2	gFS	Golan et al. (2021)		Pancreas
PCSI_0694_Pa_P_526	0.000425659	0								BRCA2	gFS	Golan et al. (2021)		Pancreas
PCSI_0699_Lv_M_526	0.043865569	0.002								BRCA2	gSG	Golan et al. (2021)		Pancreas
PCSI_0701_Pa_P_526	0.999625567	0.082								RAD51B	sSV	Golan et al. (2021)		Pancreas
PCSI_0707_Pa_P_526	0.041965985	0								BRCA2	gFS	Golan et al. (2021)		Pancreas
PCSI_0708_Lv_M_526	0.002115227	0								BRCA2	gFS	Golan et al. (2021)		Pancreas
PCSI_0749_Lv_M_526	0.002835101	0.002								BRCA2	gSG	Golan et al. (2021)		Pancreas
PCSI_0760_Lv_M_526	0.03472758	0								BRCA2	sSV	Golan et al. (2021)		Pancreas
PCSI_0762_Pa_P_526	0.122952491	0								RAD51B	sSV	Golan et al. (2021)		Pancreas
PCSI_0764_Pa_P_526	0.000195964	0								BRCA2	sSP	Golan et al. (2021)		Pancreas
PCSI_0775_Lv_M_526	0.006609489	0								RAD51B	sSV	Golan et al. (2021)		Pancreas
PCSI_0795_Lv_M_526	0.094097849	0								BRCA1	sSV	Golan et al. (2021)		Pancreas
PCSI_0934_Pm_M_526	0.040010603	0								BRCA1	sNS	Golan et al. (2021)		Pancreas
PCSI_0942_Lv_M_526	0.000378735	0								BRCA2	gSG	Golan et al. (2021)		Pancreas
PCSI_1002_Lv_M_526	0.009366018	0					Somatic					Golan et al. (2021)		Pancreas
PCSI_1007_Lv_M_526	0.059523726	0					Somatic					Golan et al. (2021)		Pancreas
PCSI_1020_Lv_M_526	0.002178276	0								BRCA2	gSG	Golan et al. (2021)		Pancreas
PCSI_1056_Ln_M_526	0.001800839	0								BRCA2	sNS	Golan et al. (2021)		Pancreas
PD5928	0.998598748	0.846	BRCA2_type		Deep deletion							Nguyen et al. (2020)	True	Breast
PD10010	0.032909989	0												Breast
PD11336	0.001378015	0												Breast
PD11337	0.020922688	0.002												Breast
PD11338	0.002251293	0												Breast
PD11339	0.000390765	0												Breast
PD11340	0.610711919	0												Breast
PD11341	0.000834978	0												Breast
PD11342	0.000318672	0												Breast
PD11343	0.028747222	0												Breast
PD11344	0.000777204	0												Breast
PD11345	0.001986566	0												Breast
PD11346	0.003960476	0												Breast
PD11347	0.157507285	0												Breast
PD11348	0.00456955	0												Breast
PD11349	0.602609082	0.002												Breast
PD11352	0.000357946	0												Breast
PD11355	0.000902554	0												Breast
PD11357	0.000140803	0												Breast
PD11359	0.001268958	0												Breast
PD11360	0.006535187	0												Breast
PD11361	0.000201948	0												Breast
PD11364	0.004639509	0												Breast
PD11365	9.17e-05	0												Breast
PD11366	0.000200032	0												Breast
PD11367	0.004727153	0.01												Breast
PD11368	0.006230496	0												Breast
PD11369	0.004724656	0												Breast
PD11374	0.01050525	0												Breast
PD11375	0.000885368	0												Breast
PD11376	0.002041739	0												Breast
PD11379	0.018983561	0.002												Breast
PD11380	0.00335179	0												Breast
PD11381	0.000985874	0												Breast
PD11383	0.002856572	0												Breast
PD11384	0.046292062	0.064												Breast
PD11385	0.000795556	0												Breast
PD11386	0.021678086	0												Breast
PD11388	0.005456807	0												Breast
PD11389	6.62e-05	0												Breast
PD11391	0.001295413	0												Breast
PD11393	0.000142752	0												Breast
PD11394	0.000189305	0												Breast
PD11395	0.000739979	0												Breast
PD11396	0.015214668	0												Breast
PD11397	0.001953584	0												Breast
PD11398	0.013816599	0.002												Breast
PD11399	0.001022594	0												Breast
PD11402	0.000446477	0												Breast
PD11462	0.025028301	0												Breast
PD11465	0.009038509	0												Breast
PD11740	0.000371881	0												Breast
PD11741	0.000551276	0												Breast
PD11743	0.008441977	0												Breast
PD11744	0.000895118	0												Breast
PD11745	0.024010548	0												Breast
PD11753	0.011816096	0.002												Breast
PD11756	0.000795698	0												Breast
PD11757	0.160909861	0.12	cant_be_determined											Breast
PD11760	0.003336054	0												Breast
PD11761	0.042900014	0.002												Breast
PD11762	0.001591613	0												Breast
PD11765	0.018952839	0.002												Breast
PD11766	0.009932032	0.002												Breast
PD11767	8.62e-05	0	cant_be_determined											Breast
PD11769	0.012358747	0												Breast
PD11816	0.0006297	0.004												Breast
PD13164	0.013684818	0												Breast
PD13165	0.149912334	0												Breast
PD13166	0.002632953	0												Breast
PD13167	0.034297794	0												Breast
PD13168	0.002306737	0												Breast
PD13302	0.00019456	0												Breast
PD13306	0.000840286	0												Breast
PD13307	0.000466173	0												Breast
PD13310	7.32e-05	0												Breast
PD13312	0.029443926	0.002												Breast
PD13419	0.007947592	0												Breast
PD13420	0.000512759	0												Breast
PD13422	0.016658499	0												Breast
PD13424	0.001817987	0												Breast
PD13425	0.393779455	0												Breast
PD13427	6.13e-05	0												Breast
PD13428	0.029171149	0												Breast
PD13603	0.008281886	0												Breast
PD13605	0.013921656	0												Breast
PD13606	0.059415461	0												Breast
PD13607	0.002873254	0												Breast
PD13608	0.000230077	0												Breast
PD13609	0.008492806	0												Breast
PD13619	0.001212597	0												Breast
PD13620	0.828552983	0												Breast
PD13623	0.003604624	0.014												Breast
PD13625	0.004480023	0												Breast
PD13626	0.001090897	0												Breast
PD13629	0.002089765	0												Breast
PD13630	0.007790731	0												Breast
PD13631	0.000867001	0												Breast
PD13752	0.072128324	0												Breast
PD13753	0.000633241	0												Breast
PD13754	0.00880089	0												Breast
PD13755	0.000354766	0												Breast
PD13757	0.0009632	0	cant_be_determined											Breast
PD13758	0.002798318	0												Breast
PD13761	0.000410566	0.002												Breast
PD13762	0.001214903	0.04												Breast
PD13763	0.001243914	0												Breast
PD13764	0.005596175	0.008												Breast
PD13765	0.02470445	0												Breast
PD13766	0.002475724	0.002												Breast
PD13767	0.003475693	0												Breast
PD13768	4.02e-05	0												Breast
PD13770	0.000420781	0												Breast
PD14432	0.000349056	0												Breast
PD14433	0.000252328	0												Breast
PD14435	0.000284151	0												Breast
PD14437	0.021445845	0.002												Breast
PD14439	0.000416636	0												Breast
PD14441	0.000600962	0.02												Breast
PD14450	0.000588631	0.002												Breast
PD14453	0.036001371	0												Breast
PD14454	0.073278871	0												Breast
PD14456	0.000342006	0												Breast
PD14457	0.001539186	0												Breast
PD14459	0.000365999	0												Breast
PD14460	0.000831738	0												Breast
PD14461	0.004803149	0												Breast
PD14462	0.000260042	0												Breast
PD14465	0.013363606	0												Breast
PD14467	0.015783718	0												Breast
PD14468	0.002603368	0												Breast
PD14471	0.011524629	0												Breast
PD14472	0.000206526	0												Breast
PD14473	0.005284455	0												Breast
PD17973	0.000231203	0												Breast
PD17981	0.001143092	0												Breast
PD17991	0.000625009	0												Breast
PD17994	0.000186542	0												Breast
PD18022	0.004289025	0												Breast
PD18045	0.00928276	0												Breast
PD18046	0.029608372	0												Breast
PD18047	0.020562596	0												Breast
PD18048	0.02818454	0												Breast
PD18049	0.009717166	0												Breast
PD18050	0.047161732	0												Breast
PD18100	0.000140523	0												Breast
PD18101	0.000103936	0												Breast
PD18116	0.000466432	0												Breast
PD18149	0.00422237	0												Breast
PD18188	0.042593232	0												Breast
PD18189	0.071281094	0.002												Breast
PD18247	4e-05	0.004												Breast
PD18251	0.51120215	0.004												Breast
PD18257	0.049042851	0												Breast
PD18258	0.005477375	0												Breast
PD18264	0.000325823	0												Breast
PD18269	0.000518422	0												Breast
PD18728	0.000170835	0.04												Breast
PD18730	0.001492603	0.002												Breast
PD18733	0.000234421	0												Breast
PD18734	0.000288218	0												Breast
PD18748	0.00054069	0												Breast
PD18749	6.89e-05	0.004												Breast
PD18751	0.001544939	0												Breast
PD18754	0.00990534	0												Breast
PD18756	0.004270999	0												Breast
PD18768	0.005894851	0												Breast
PD18769	0.009726534	0												Breast
PD18771	0.003566042	0												Breast
PD18775	0.001241264	0												Breast
PD18776	0.001382546	0												Breast
PD4252	0.128499518	0												Breast
PD4261	0.023258182	0												Breast
PD4844	0.99960742	0.832	BRCA2_type											Breast
PD4847	0.003697385	0.002												Breast
PD4969	0.000720615	0												Breast
PD4975	0.978776265	0.796	BRCA2_type											Breast
PD4977	0.000513098	0.002												Breast
PD5937	8.84e-06	0.022	cant_be_determined											Breast
PD5946	0.021377578	0												Breast
PD5951	0.015507964	0												Breast
PD5953	0.105721255	0												Breast
PD5959	0.000534948	0												Breast
PD5964	0.001435618	0												Breast
PD6045	0.012619935	0.004												Breast
PD6410	0.975105098	0.502	BRCA1_type											Breast
PD6412	0.008626482	0	cant_be_determined											Breast
PD6466	0.001241844	0												Breast
PD6711	0.069733911	0												Breast
PD6728	0.091707213	0.008												Breast
PD7069	0.002563639	0												Breast
PD7220	0.045404661	0												Breast
PD7238	0.001682862	0												Breast
PD7243	0.016686406	0												Breast
PD7322	0.001504428	0												Breast
PD8609	0.005876506	0.002												Breast
PD8612	0.000268594	0												Breast
PD8614	0.004909686	0												Breast
PD8615	0.003211783	0												Breast
PD8617	0.000314808	0												Breast
PD8619	0.011187041	0												Breast
PD8620	0.000479567	0.004												Breast
PD8660	0.75389092	0.002												Breast
PD8828	0.00119305	0.002												Breast
PD8973	0.000540132	0												Breast
PD8977	0.003479067	0												Breast
PD8979	0.003725056	0												Breast
PD8981	0.026098186	0												Breast
PD8982	0.568497438	0.006												Breast
PD9063	5.31e-05	0.002												Breast
PD9065	0.001095574	0												Breast
PD9067	0.006558349	0												Breast
PD9193	0.003238594	0												Breast
PD9539	0.000727003	0												Breast
PD9541	0.000790409	0												Breast
PD9544	0.000548206	0.036												Breast
PD9577	0.00182535	0												Breast
PD9578	7.83e-05	0												Breast
PD9582	0.007714309	0												Breast
PD9591	0.00202701	0												Breast
PD9593	0.009205042	0												Breast
PD9595	0.999440565	0.89	BRCA1_type											Breast
PD9597	0.000419911	0.002	cant_be_determined											Breast
PD9600	0.004607025	0												Breast
PD9604	6.15e-05	0												Breast
PD9752	0.033983755	0												Breast
PD9754	0.001832583	0												Breast
PD9755	0.005566421	0												Breast
PD9756	0.001619871	0												Breast
PD9759	0.006129495	0												Breast
PD9761	0.000148862	0												Breast
PD9842	0.001084914	0												Breast
PD9847	0.012210087	0.048												Breast
PD3851	0.004058908	0												Breast
PD4085	0.001798196	0												Breast
PD4199	0.002168144	0												Breast
PD4109	0.421911426	0.002												Breast
PD4248	0.254403698	0												Breast
PD4086	0.887800989	0.104												Breast
PD4069	0.005241915	0												Breast
PD4967	0.013221221	0												Breast
PD4970	0.002700465	0												Breast
PD4072	0.000218655	0.004												Breast
PD4613	2.46e-05	0												Breast
PD4971	0.011135722	0												Breast
PD4985	0.007106475	0												Breast
PD4266	0.008154673	0.008												Breast
PD4976	0.006690923	0												Breast
PD4986	0.057802294	0												Breast
PD4962	0.018973816	0												Breast
PD7199	0.002561189	0												Breast
PD4981	0.000259162	0												Breast
PD4606	0.062988928	0.014												Breast
PD7201	0.000357209	0												Breast
PD4255	0.267513936	0												Breast
PD8965	0.382160182	0.006												Breast
PD5944	0.031260008	0												Breast
PD11752	0.141323348	0												Breast
PD4845	0.996965286	0.668	BRCA1_type											Breast
PD9605	0.238564391	0.014												Breast
PD7209	0.000360735	0.042												Breast
PD7207	0.000579694	0												Breast
PD4225	0.001481382	0												Breast
PD7221	0.001880044	0												Breast
PD7218	0.00220214	0												Breast
PD6719	0.082789409	0.002												Breast
PD5936	0.003547406	0												Breast
PD7219	0.00718438	0												Breast
PD6721	0.031801931	0.014												Breast
PD6720	0.007843214	0												Breast
PD5956	0.621344344	0.07												Breast
PD4965	0.006715507	0												Breast
PD6417	0.003254407	0												Breast
PD6043	0.999866354	0.784	BRCA1_type											Breast
PD4315	0.03089151	0												Breast
PD7214	0.00113754	0												Breast
PD6041	0.008599458	0												Breast
PD6418	0.003582878	0.004												Breast
PD7210	0.000399271	0												Breast
PD6422	0.457051062	0												Breast
PD5961	0.02415455	0												Breast
PD4968	0.023776423	0												Breast
PD7206	0.024433944	0												Breast
PD9599	0.056212544	0.002												Breast
PD8618	0.00215882	0												Breast
PD8622	0.025161383	0												Breast
PD9001	0.000434614	0												Breast
PD8623	0.019211436	0.002												Breast
PD4605	0.007260711	0												Breast
PD5950	0.090838261	0												Breast
PD8830	0.651366553	0.038												Breast
PD4980	0.121664381	0												Breast
PD8964	0.999488395	0.846	BRCA2_type											Breast
PD13622	0.720074349	0												Breast
a330a96e-9897-4605-b5f1-5b5ef45cd365	0.979587788	0.124												Ovary
e45f3391-2e74-4767-817a-280cebac7c57	0.131913151	0												Ovary
e4aaca83-3ae9-47f6-a975-c144767ad705	0.84153066	0.65	BRCA2_type											Ovary
745b8756-0eab-423f-8cde-e0ff1aaa6596	0.26206425	0.05												Ovary
7fdd07a4-4a27-40c3-af92-a0074e6391f5	0.084929482	0.046												Ovary
e6f7344b-951f-4f3f-b140-7bf53164c462	0.021758776	0												Ovary
bbb2cf2f-8f32-43d4-846c-d1020e6329ec	0.07096474	0.002												Ovary
4e913899-eeb8-4630-ba9d-41a81ced8069	0.888508085	0.32												Ovary
d392ded3-afc8-4c79-b278-40245f18f2f8	0.019767709	0												Ovary
86f23897-dba0-4e89-8381-d174eaa6fcc1	0.609503219	0.076												Ovary
6c31d730-1734-44ac-92b3-760981528723	0.531195711	0.162												Ovary
6821446e-8e76-46fe-b0b9-47feb46d2585	0.17767465	0.038												Ovary
941fcb56-e059-403d-aab1-0692a3ecc45e	0.852389648	0.044												Ovary
cd9efdef-a7fb-49e5-9515-63606ae8bbfc	0.220430444	0												Ovary
b97941dd-9844-4db2-9e25-42c725f47d70	0.00210687	0												Ovary
2a8d63eb-0174-4213-9214-413f391f512c	0.518115346	0.07												Ovary
12874085-a596-41ae-b4cd-817cb1ebb278	0.033933252	0												Ovary
9aecfc8f-62ea-4acf-aa00-d1f0fe6c6556	0.002149946	0												Ovary
6ce42746-88aa-485f-a1c4-1759aad95914	0.008302105	0												Ovary
acd510de-b732-4a1a-8b72-6d22e763540b	0.802282664	0.686	BRCA2_type											Ovary
25f73b03-4ba8-47ba-ad80-6ccb82105c98	0.343726284	0.084												Ovary
5b560f4c-d2a3-43fa-b394-abef78bdefc1	0.06520971	0.01												Ovary
8b28f6d2-4b7d-493b-826e-b119a4fb0cb4	0.785426856	0.05												Ovary
0009b464-b376-4fbc-8a56-da538269a02f	0.024626278	0.022												Ovary
6fffe0cf-bb38-4e77-88ab-a256bd7fbbce	0.997657264	0.864	BRCA1_type											Ovary
504cdfc5-6721-43ef-b31e-fdf52f0cd9cd	0.025157311	0.01												Ovary
f858d813-f3c5-4ad9-8c20-9f231d6624d8	0.999854476	0.798	BRCA2_type											Ovary
5d922e48-aa70-454d-9417-c9af686feebc	0.016466355	0.012												Ovary
1659bae5-3140-4d05-891c-81b48277b2fc	0.752672464	0.076												Ovary
f1504811-8363-41e6-b43c-62452b1262d3	0.523919726	0.022												Ovary
3a6bce45-0431-49d8-82df-b1d9a738e5a6	0.799448654	0.004												Ovary
01df36af-3617-40fc-9892-f54ce433cf71	0.023362732	0												Ovary
bbe59385-5f83-43f6-a485-517c860bef6f	1.01e-05	0	cant_be_determined											Ovary
123c9d1c-72ba-4d82-8e57-d5caa52a40ba	0.950482221	0.688	BRCA1_type											Ovary
89dad92e-5b3f-479a-a6da-a94ee7df7f8a	0.058794738	0.002												Ovary
09508a0d-ebe0-4fa1-b7b2-1710814181cd	0.060124217	0.066												Ovary
ASHPC_0001_Pa_P_2	0.000175347	0												Pancreas
ASHPC_0003_Pa_P_2	0.219010832	0.006												Pancreas
ASHPC_0009_Pa_P	0.003801546	0												Pancreas
ASHPC_0010_Pa_P	0.006910743	0												Pancreas
ASHPC_0013_Pa_P	0.00190625	0.002												Pancreas
ASHPC_0015_Pa_P	0.000915031	0												Pancreas
ASHPC_0016_Pa_P	0.05213448	0												Pancreas
ASHPC_0017_Pa_P	0.000329174	0												Pancreas
ASHPC_0022_Pa_P	0.004752196	0												Pancreas
ASHPC_0023_Pa_P	0.000285906	0												Pancreas
ASHPC_0026_Pa_P	0.017835317	0												Pancreas
ASHPC_0027_Pa_P	0.005863843	0												Pancreas
ASHPC_0028_Pa_P	0.0040519	0												Pancreas
ASHPC_0029_Pa_P	0.00121468	0												Pancreas
ASHPC_0030_Pa_P	0.000506886	0.018												Pancreas
ASHPC_0031_Pa_P	0.004126855	0												Pancreas
ASHPC_0034_Pa_P	9.26e-05	0												Pancreas
PCSI_0004_Pa_P_526	0.008370352	0												Pancreas
PCSI_0019_Pa_P_526	0.000909857	0												Pancreas
PCSI_0023_Pa_P	0.029166009	0												Pancreas
PCSI_0044_Pa_P_526	0.000513756	0												Pancreas
PCSI_0046_Pa_P_526	0.006927884	0												Pancreas
PCSI_0047_Pa_P_526	0.020713141	0												Pancreas
PCSI_0072_Pa_P_526	0.13644866	0												Pancreas
PCSI_0073_Pa_P_526	0.02669235	0												Pancreas
PCSI_0074_Pa_P_526	0.000611051	0												Pancreas
PCSI_0077_Pa_P_526	0.000943174	0												Pancreas
PCSI_0078_Pa_P_526	0.000340578	0												Pancreas
PCSI_0080_Pa_P_526	0.012371717	0												Pancreas
PCSI_0081_Pa_P_526	0.025972131	0												Pancreas
PCSI_0082_Pa_P_526	0.209441932	0												Pancreas
PCSI_0084_Pa_P_526	0.002358764	0												Pancreas
PCSI_0085_Pa_P_526	0.023319443	0.002												Pancreas
PCSI_0096_Pa_P_526	0.000160205	0.018												Pancreas
PCSI_0098_Pa_P_526	0.007416135	0												Pancreas
PCSI_0099_Pa_P_526	0.506638048	0												Pancreas
PCSI_0102_Pa_P_526	0.002160976	0												Pancreas
PCSI_0104_Pa_P_526	0.442830715	0												Pancreas
PCSI_0105_Pa_P_526	0.006194274	0												Pancreas
PCSI_0108_Pa_P_526	0.016942303	0.002												Pancreas
PCSI_0109_Pa_P_526	0.020264683	0												Pancreas
PCSI_0111_Pa_P_526	0.266544849	0												Pancreas
PCSI_0132_Pa_P_526	0.131267955	0												Pancreas
PCSI_0162_Pa_P_526	0.04368459	0												Pancreas
PCSI_0164_Pa_P_526	0.00024179	0.002												Pancreas
PCSI_0169_Pa_P_526	0.023269925	0												Pancreas
PCSI_0170_Pa_P_526	0.001839206	0												Pancreas
PCSI_0171_Pa_P_526	0.000258025	0												Pancreas
PCSI_0173_Pa_P_526	0.188485107	0												Pancreas
PCSI_0174_Pa_P_526	0.02673214	0												Pancreas
PCSI_0175_Pa_P_526	0.002466795	0												Pancreas
PCSI_0208_Pa_P_526	0.001128789	0												Pancreas
PCSI_0210_Pa_P_526	0.152520453	0												Pancreas
PCSI_0216_Pa_P_526	0.015895556	0												Pancreas
PCSI_0217_Pa_P_526	0.2491077	0.002												Pancreas
PCSI_0226_Pa_P_526	0.803860959	0												Pancreas
PCSI_0227_Pa_P_526	0.001288067	0												Pancreas
PCSI_0228_Pa_P_526	0.01913258	0.002												Pancreas
PCSI_0230_Pa_P_526	0.006886782	0												Pancreas
PCSI_0233_Pa_P_526	0.001058616	0												Pancreas
PCSI_0235_Pa_P_526	0.024083973	0												Pancreas
PCSI_0236_Pa_P_526	0.032416668	0												Pancreas
PCSI_0237_Pa_P_526	0.000992147	0												Pancreas
PCSI_0239_Pa_P_526	0.001441051	0												Pancreas
PCSI_0240_Pa_P_526	0.004366081	0												Pancreas
PCSI_0261_Pa_P_526	0.999945104	0.71	BRCA2_type											Pancreas
PCSI_0263_Pa_P_526	0.184925482	0												Pancreas
PCSI_0264_Pa_P_526	0.000109313	0												Pancreas
PCSI_0268_Pa_P_526	0.000809951	0												Pancreas
PCSI_0269_Pa_P_526	0.099607615	0												Pancreas
PCSI_0279_Pa_P_526	0.000408366	0												Pancreas
PCSI_0281_Pa_P_526	0.001645577	0												Pancreas
PCSI_0283_Pa_P_526	0.053610313	0.038												Pancreas
PCSI_0287_Pa_P_526	0.013026213	0												Pancreas
PCSI_0290_Pa_P_526	0.088774672	0												Pancreas
PCSI_0294_Pa_P_526	0.002810528	0												Pancreas
PCSI_0295_Pa_P_526	0.001362281	0												Pancreas
PCSI_0297_Pa_P_526	0.005870055	0												Pancreas
PCSI_0300_Pa_P_526	0.119023462	0												Pancreas
PCSI_0302_Pa_P_526	0.000184913	0												Pancreas
PCSI_0303_Pa_P_526	0.013993772	0												Pancreas
PCSI_0305_Pa_P_526	0.340807297	0												Pancreas
PCSI_0307_Pa_P_526	0.001511957	0												Pancreas
PCSI_0311_Pa_P_526	0.002692938	0												Pancreas
PCSI_0312_Pa_P_526	0.001498179	0												Pancreas
PCSI_0326_Pa_P_526	0.021899024	0												Pancreas
PCSI_0328_Pa_P_526	0.035221314	0.022												Pancreas
PCSI_0330_Pa_P_526	0.00159305	0												Pancreas
PCSI_0334_Pa_P_526	0.05594162	0												Pancreas
PCSI_0337_Pa_P_526	0.006058909	0												Pancreas
PCSI_0340_Pa_P_526	0.020248201	0												Pancreas
PCSI_0343_Pa_P_526	0.001207263	0												Pancreas
PCSI_0344_Pa_P_526	0.004994169	0												Pancreas
PCSI_0345_Pa_P_526	0.000624571	0												Pancreas
PCSI_0347_Pa_P_526	0.073772008	0												Pancreas
PCSI_0350_Pa_P_526	0.001484916	0												Pancreas
PCSI_0352_Pa_P_526	0.002903658	0												Pancreas
PCSI_0356_Pa_P_526	0.007840911	0												Pancreas
PCSI_0357_Pa_P_526	0.001550904	0												Pancreas
PCSI_0358_Pa_P_526	0.011607548	0.004												Pancreas
PCSI_0449_Pa_P_526	0.000379283	0												Pancreas
PCSI_0463_Pa_P_526	0.915009895	0.606	cant_be_determined											Pancreas
PCSI_0465_Pa_P_526	0.00262242	0												Pancreas
PCSI_0466_Pa_P_526	0.004806758	0												Pancreas
PCSI_0467_Pa_P_526	0.000459593	0												Pancreas
PCSI_0468_Pa_P_526	0.001906478	0												Pancreas
PCSI_0469_Pa_P_526	0.115315959	0												Pancreas
PCSI_0473_Pa_P_526	0.002633677	0												Pancreas
PCSI_0504_Pa_P_526	0.005514865	0												Pancreas
PCSI_0509_Pa_P_526	0.000225098	0.048												Pancreas
PCSI_0511_Pa_P_526	0.001741411	0												Pancreas
PCSI_0518_Pa_P_526	0.004770753	0												Pancreas
PCSI_0527_Pa_P_526	0.000556585	0												Pancreas
PCSI_0528_Pa_P_526	0.000758731	0												Pancreas
PCSI_0531_Pa_P_526	0.000132911	0												Pancreas
PCSI_0534_Pa_P_526	0.001143197	0												Pancreas
PCSI_0549_Pa_P_5266	0.008980604	0												Pancreas
PCSI_0572_Pa_P_526	0.758022962	0												Pancreas
PCSI_0588_Pa_P_526	0.025518862	0												Pancreas
PCSI_0589_Pa_P_526	0.656560465	0												Pancreas
PCSI_0590_Pa_P_526	0.003549172	0												Pancreas
PCSI_0591_Pa_P_526	0.031621991	0												Pancreas
PCSI_0592_Pa_P_526	0.002668885	0												Pancreas
PCSI_0593_Pa_P_526	0.003260202	0												Pancreas
PCSI_0594_Pa_P_526	0.013490295	0												Pancreas
PCSI_0602_Pa_P_526	0.188667614	0												Pancreas
PCSI_0608_Pa_P_526	0.005126599	0.004												Pancreas
PCSI_0609_Pa_P_526	0.193676793	0.002												Pancreas
PCSI_0610_Pa_P_526	8.94e-05	0												Pancreas
PCSI_0611_Pa_P_526	0.005324172	0												Pancreas
PCSI_0616_Pa_P_526	0.002624182	0												Pancreas
PCSI_0623_Pa_P_526	0.005247349	0												Pancreas
PCSI_0625_Pa_P_526	0.001323406	0												Pancreas
PCSI_0626_Pa_P_526	0.500533025	0.002												Pancreas
PCSI_0627_Pa_P_526	0.029878972	0.002												Pancreas
PCSI_0628_Pa_P_526	0.018148823	0												Pancreas
PCSI_0629_Pa_P_526	0.003995504	0.002												Pancreas
PCSI_0630_Lv_M_526	0.010431505	0												Pancreas
PCSI_0632_Lv_M_526	0.008177025	0.026												Pancreas
PCSI_0633_Pa_P	0.02554936	0.002												Pancreas
PCSI_0634_Lv_M	0.046131296	0												Pancreas
PCSI_0637_Lv_M_526	0.01650021	0												Pancreas
PCSI_0638_Pa_P_526	0.004373961	0												Pancreas
PCSI_0639_Pa_P_526	0.000994387	0												Pancreas
PCSI_0640_Om_M_526	0.000765544	0												Pancreas
PCSI_0641_Lv_M_526	0.037400083	0												Pancreas
PCSI_0642_Pa_P_526	0.003506486	0												Pancreas
PCSI_0643_Pa_P_526	0.001182775	0												Pancreas
PCSI_0644_Lv_M_526	0.952273729	0												Pancreas
PCSI_0645_Pa_P_526	0.002066676	0												Pancreas
PCSI_0646_Lv_M_526	0.047637092	0												Pancreas
PCSI_0647_Lv_M_526	0.016398408	0.002												Pancreas
PCSI_0648_Lv_M_526	0.336627849	0												Pancreas
PCSI_0649_Pa_P_526	0.027945486	0												Pancreas
PCSI_0650_Lv_M_526	0.014843494	0												Pancreas
PCSI_0651_Lv_M_526	0.0270291	0												Pancreas
PCSI_0653_Pa_P_526	0.682864757	0												Pancreas
PCSI_0655_Pa_P_526	0.000423357	0												Pancreas
PCSI_0660_Pa_P_526	0.00625271	0												Pancreas
PCSI_0661_Pa_P_526	0.001890345	0.006												Pancreas
PCSI_0662_Lv_M_526	0.020120784	0												Pancreas
PCSI_0663_Lv_M_526	0.999494765	0												Pancreas
PCSI_0664_Lv_M_526	0.005973896	0												Pancreas
PCSI_0665_Lv_M_526	0.203665017	0												Pancreas
PCSI_0667_Lv_M_526	0.040034622	0												Pancreas
PCSI_0669_Lv_M	0.007680454	0												Pancreas
PCSI_0670_Lv_M_526	0.003034957	0.002												Pancreas
PCSI_0673_Lv_M_526	0.003545532	0												Pancreas
PCSI_0674_Pa_P_526	0.000488938	0												Pancreas
PCSI_0675_Lv_M_526	0.013367868	0												Pancreas
PCSI_0676_Lv_M_526	0.001967581	0												Pancreas
PCSI_0678_Lv_M_526	0.203739722	0.004												Pancreas
PCSI_0679_Pa_P_526	0.000365695	0												Pancreas
PCSI_0680_Pa_P_526	0.000411793	0												Pancreas
PCSI_0685_Lv_M_526	0.01558296	0												Pancreas
PCSI_0687_Pa_P_526	0.002641213	0												Pancreas
PCSI_0690_Pa_P_526	0.002473595	0												Pancreas
PCSI_0691_Pa_P_526	0.91311509	0												Pancreas
PCSI_0692_Pa_P_526	0.002236254	0												Pancreas
PCSI_0693_Lv_M_526	0.019046224	0												Pancreas
PCSI_0695_Lv_M_526	0.03399034	0.002												Pancreas
PCSI_0697_Lv_M_526	0.148663764	0												Pancreas
PCSI_0698_Lv_M_526	0.000941222	0												Pancreas
PCSI_0700_Pa_P_526	0.036879737	0												Pancreas
PCSI_0704_Lv_M_526	0.96042825	0.024												Pancreas
PCSI_0709_Lv_M_526	0.004534932	0												Pancreas
PCSI_0711_Pa_P_526	0.081937425	0												Pancreas
PCSI_0712_Lv_M_526	0.000674105	0												Pancreas
PCSI_0713_Ab_M_526	0.006719648	0.004												Pancreas
PCSI_0714_Lv_M_526	0.002520529	0												Pancreas
PCSI_0717_Lv_M_526	0.001576034	0												Pancreas
PCSI_0718_Om_M_526	0.020473203	0												Pancreas
PCSI_0719_Lv_M_526	0.003275746	0												Pancreas
PCSI_0720_Lv_M_526	0.007924322	0												Pancreas
PCSI_0721_Pa_P_526	0.998548654	0.764	BRCA2_type											Pancreas
PCSI_0722_Lv_M_526	0.005622974	0												Pancreas
PCSI_0723_Lv_M_526	0.203896466	0												Pancreas
PCSI_0724_Pa_P_526	0.473978002	0												Pancreas
PCSI_0725_Pa_P_526	0.024261985	0												Pancreas
PCSI_0726_Lv_M_526	0.024568629	0												Pancreas
PCSI_0727_Pa_P_526	0.000780127	0.002												Pancreas
PCSI_0728_Lv_M_523	0.003455378	0												Pancreas
PCSI_0730_Pa_P_526	0.037631943	0												Pancreas
PCSI_0731_Lv_M_526	0.003366339	0												Pancreas
PCSI_0732_Pa_P_526	0.000452931	0.002												Pancreas
PCSI_0733_Lv_M_526	0.026400902	0												Pancreas
PCSI_0734_Lv_M_526	0.000898705	0												Pancreas
PCSI_0736_Lv_M_526	0.076924244	0												Pancreas
PCSI_0738_Lv_M_526	0.000538923	0												Pancreas
PCSI_0739_Lv_M_526	0.167142	0												Pancreas
PCSI_0740_Pm_M_526	0.003228063	0												Pancreas
PCSI_0741_Pa_P_526	0.005532279	0												Pancreas
PCSI_0742_Pa_P_526	0.011394864	0												Pancreas
PCSI_0743_Lv_M_526	0.005781965	0												Pancreas
PCSI_0744_Pa_P_526	0.000408571	0												Pancreas
PCSI_0746_Lv_M_526	0.592661811	0												Pancreas
PCSI_0747_Lv_M_526	0.994374797	0.08												Pancreas
PCSI_0748_Lv_M_526	0.024614248	0												Pancreas
PCSI_0753_Pa_P_526	0.002477498	0												Pancreas
PCSI_0754_Lv_M_526	0.001088025	0												Pancreas
PCSI_0756_Pa_P_526	0.002047965	0												Pancreas
PCSI_0757_Lv_M_526	0.015268928	0												Pancreas
PCSI_0761_Pa_P_526	0.052906473	0												Pancreas
PCSI_0763_Pm_M_526	0.002924967	0												Pancreas
PCSI_0765_Lv_M_526	0.007321614	0												Pancreas
PCSI_0767_Lv_M_526	0.956419818	0.002												Pancreas
PCSI_0768_Lv_M_526	0.182373494	0												Pancreas
PCSI_0769_Lv_M_526	0.000155607	0												Pancreas
PCSI_0770_Lv_M_526	0.00253103	0												Pancreas
PCSI_0771_Pa_P_526	0.042914545	0												Pancreas
PCSI_0772_Pa_P_526	0.012335692	0												Pancreas
PCSI_0774_Pa_P_526	0.006721976	0.026												Pancreas
PCSI_0776_Pa_P_526	0.007351926	0												Pancreas
PCSI_0777_Lv_M_526	0.045181833	0												Pancreas
PCSI_0778_Lv_M_526	0.622214355	0												Pancreas
PCSI_0782_Om_M_526	0.003175414	0												Pancreas
PCSI_0783_Pa_P_526	0.002703719	0												Pancreas
PCSI_0784_Lv_M	0.00146152	0												Pancreas
PCSI_0785_Lv_M_526	0.010172165	0												Pancreas
PCSI_0794_Pa_P_526	0.001685806	0												Pancreas
PCSI_0796_Lv_M_526	0.873692106	0												Pancreas
PCSI_0799_Lv_M_526	0.011105696	0												Pancreas
PCSI_0800_Lu_M_526	0.021153649	0												Pancreas
PCSI_0801_Lv_M_526	0.001867497	0												Pancreas
PCSI_0806_Pa_P_526	0.023953242	0												Pancreas
PCSI_0812_Pa_P_526	0.058104309	0												Pancreas
PCSI_0813_Pa_P_526	0.032797808	0												Pancreas
PCSI_0814_Pa_P_526	0.601644917	0												Pancreas
PCSI_0815_Lv_M_526	0.039630586	0												Pancreas
PCSI_0816_Lv_M_526	0.002418154	0												Pancreas
PCSI_0817_Lv_M_526	0.031245183	0												Pancreas
PCSI_0818_Lv_M_526	0.017847846	0												Pancreas
PCSI_0890_Pa_P_526	0.000373791	0												Pancreas
PCSI_0935_Pa_P_526	0.619688409	0												Pancreas
PCSI_0937_Lv_M_526	0.401127656	0												Pancreas
PCSI_0939_Pm_M_526	0.299135733	0												Pancreas
PCSI_0941_Lv_M_526	4.95e-05	0												Pancreas
PCSI_0943_Lv_M_526	0.035278494	0												Pancreas
PCSI_0944_Lv_M_526	0.431046629	0												Pancreas
PCSI_0956_Lv_M_526	0.000619898	0												Pancreas
PCSI_0968_Lv_M_526	0.994342653	0												Pancreas
PCSI_0976_Ln_M_526	0.004273446	0												Pancreas
PCSI_0977_Lv_M_526	0.018514408	0												Pancreas
PCSI_0978_Pa_P_526	0.000686894	0												Pancreas
PCSI_0979_Om_M_526	0.000576172	0.002												Pancreas
PCSI_0980_Lv_M_526	0.003918997	0												Pancreas
PCSI_0987_Lv_M_526	0.031924498	0												Pancreas
PCSI_0989_Pa_P_526	0.017341576	0												Pancreas
PCSI_0990_Ab_M_526	0.001656299	0												Pancreas
PCSI_0991_Pm_M_526	0.943437166	0												Pancreas
PCSI_0993_Lv_M_526	0.148842646	0.012												Pancreas
PCSI_0995_Pa_P_526	0.000689989	0												Pancreas
PCSI_0996_Pa_P_526	0.005042068	0												Pancreas
PCSI_0998_Pa_P_526	0.011398699	0												Pancreas
PCSI_0999_Lv_M_526	0.018090437	0												Pancreas
PCSI_1003_Lv_M_526	0.826045278	0.002												Pancreas
PCSI_1004_Lv_M_526	0.565253421	0.004												Pancreas
PCSI_1005_Lv_M_526	0.091841977	0												Pancreas
PCSI_1008_Lv_M_526	0.065216495	0												Pancreas
PCSI_1010_Lv_M_526	0.032384393	0												Pancreas
PCSI_1011_Lv_M_526	0.99962628	0.544	BRCA2_type											Pancreas
PCSI_1012_Pa_P_526	0.011655498	0												Pancreas
PCSI_1013_Lv_M_526	0.062961036	0												Pancreas
PCSI_1014_Pa_P_526	0.001061877	0												Pancreas
PCSI_1016_Pa_P_526	0.006195584	0												Pancreas
PCSI_1019_Pa_P_526	0.005731972	0												Pancreas
PCSI_1021_Pa_P_526	0.01507758	0												Pancreas
PCSI_1023_Pa_P_526	0.38882457	0												Pancreas
PCSI_1026_Lv_M_526	0.012259386	0												Pancreas
PCSI_1027_Lv_M_526	0.011100343	0												Pancreas
PCSI_1035_Pa_P_526	0.007407175	0												Pancreas
PCSI_1036_Lv_M_526	5.21e-05	0												Pancreas
PCSI_1038_Lv_M_526	0.999970024	0.004												Pancreas
PCSI_1051_Lv_M_526	0.013859569	0												Pancreas
PCSI_1057_Pa_P_5270	0.002675869	0												Pancreas
PCSI_1058_Lv_M_526	0.008355642	0.002												Pancreas
PCSI_1059_Lv_M_526	0.3188806	0												Pancreas
PCSI_1060_Lv_M_526	0.104716219	0												Pancreas
PCSI_1061_Lv_M_526	0.000329506	0.002												Pancreas
PCSI_1063_Pa_P_526	0.004453518	0												Pancreas
PCSI_1065_Lv_M_526	0.003161545	0												Pancreas
PCSI_1066_Pa_P_526	0.005656093	0												Pancreas
PCSI_1067_Lv_M_526	0.002926325	0												Pancreas
PCSI_1070_Lv_M_526	0.000867699	0												Pancreas

## Sheet: Suplementary_table_2
sample	p_hrdetect	p_chord	HRD_type	BRCA1	BRCA2	PALB2	RAD51B	RAD51C	XRCC2	moallelic_gene	motype_origin	literature	Any_event	cancer_type
0bfd1043-8181-e3e4-e050-11ac0c4860c5	0.998932359	0.904	BRCA1_type	Germline								Nguyen et al. (2020)	True	Prostate
0bfd1043-8183-e3e4-e050-11ac0c4860c5	0.990121184	0.85	BRCA2_type		Deep deletion							Nguyen et al. (2020)	True	Prostate
7ae9b843-488f-459c-8c0d-c81dcae57f99	0.213139966	0.712	BRCA2_type		Germline							Nguyen et al. (2020)	True	Prostate
ad007b59-46f6-48b9-958a-2b9d28cca3b7	0.253506328	0.66	BRCA2_type		Germline							Nguyen et al. (2020)	True	Prostate
6baee028-c622-11e3-bf01-24c6515278c0	0.991285542	0.63	BRCA1_type							BRCA2	LOH + unkwn	Nguyen et al. (2020)		Liver
7789ef18-c623-11e3-bf01-24c6515278c0	0.99911238	0.844	BRCA2_type		Germline					BRCA2		Nguyen et al. (2020)	True	Biliary
82b8cda8-fbff-455e-b0db-7ff6528bd6c8	0.112642377	0.592	BRCA2_type							BRCA2		Nguyen et al. (2020)		Lymphoid
9c27fedd-b1b3-4af0-9e9b-20271854db08	0.939767919	0.64	BRCA2_type							BRCA2	LOH + unkwn	Nguyen et al. (2020)		Lymphoid
bc1d5327-2e76-4e0e-b749-72a559469d0d	0.89757212	0.652	BRCA2_type							BRCA2		Nguyen et al. (2020)		Lymphoid
cf2d34c4-c622-11e3-bf01-24c6515278c0	0.998396686	0.694	BRCA1_type							BRCA2	LOH + unkwn	Nguyen et al. (2020)		Liver
f845ebba-8c56-b559-e040-11ac0c4863d5	0.689347499	0.702	BRCA2_type							BRCA2	LOH + unkwn	Nguyen et al. (2020)		Bone/Soft tissue
fb8b5ff5-4164-4276-b75b-b0ee6bda7329	0.995355416	0.694	BRCA1_type							BRCA2		Nguyen et al. (2020)		Head/neck
005e85a3-3571-462d-8dc9-2babfc7ace21	0.00020067	0												Prostate
008aef39-0c97-48ce-9dfd-f12d67116c59	0.000792492	0												Prostate
008bad10-d41b-4bbb-86fa-9976ecea46b1	0.00034764	0												Prostate
07f16397-71bb-4594-ad4d-caa7d2baeabd	0.000571492	0												Prostate
089be98d-c3c9-4fb4-aef2-7a8578a91d51	0.477249822	0.602	BRCA1_type											Prostate
08e1d976-6c39-428e-a4c2-f655b675683e	0.000278685	0												Prostate
0a6be23a-d5a0-4e95-ada2-a61b2b5d9485	0.00071978	0												Prostate
0bfd1043-70fb-d2dc-e050-11ac0c4860cb	0.002443208	0												Prostate
0bfd1043-8170-e3e4-e050-11ac0c4860c5	0.067144641	0												Prostate
0bfd1043-8177-e3e4-e050-11ac0c4860c5	0.001744733	0												Prostate
0bfd1043-8187-e3e4-e050-11ac0c4860c5	0.00027585	0												Prostate
0bfd1068-3fc5-a95b-e050-11ac0c4860c3	0.023594506	0												Prostate
0bfd1068-3fcf-a95b-e050-11ac0c4860c3	0.002386852	0												Prostate
0bfd1068-3fd3-a95b-e050-11ac0c4860c3	0.011661891	0												Prostate
0bfd1068-3fd8-a95b-e050-11ac0c4860c3	0.004872911	0												Prostate
0cb4356c-b5d6-4541-b048-ff6d4b3a5d26	0.000262947	0												Prostate
0ed2e2e1-2fe3-43eb-8cad-34f3f21a7169	0.000351979	0												Prostate
108b67d4-5d66-46da-8675-6acae643b76f	0.000344738	0												Prostate
120f01d1-8884-4aca-a1cb-36b207b2aa3a	0.001321456	0												Prostate
122bf0a9-8052-49da-a9d7-0e5de9ab7032	0.000554255	0												Prostate
126ee433-d345-4cac-882a-c91831a24690	4.45e-05	0												Prostate
131332b2-ff51-4bd7-a626-aff2ecea6135	0.004514645	0												Prostate
145f2b89-8878-4390-b0f6-f09b02fb138a	0.000671822	0												Prostate
186cacaf-4f20-4ad2-a07a-a7dc942a70b0	0.000340429	0												Prostate
1a319682-f55e-4e0b-8476-48a0bea6c265	0.021491292	0.002												Prostate
1bbfe6f2-ad19-4d29-895b-973f5a91c707	0.000795567	0												Prostate
1be81ade-7ad6-4e7e-90d0-f986b3fb0a25	0.005547026	0												Prostate
1d91f9c7-67ba-4606-9f0a-01ec6fc08262	0.000436858	0												Prostate
1dd96495-5f83-4d36-96cf-b77cd0cbbfda	1.33e-05	0	cant_be_determined											Prostate
1eb37b28-fac2-477a-88b3-e04291a07926	0.000884226	0												Prostate
1f04210a-0c2e-4bb8-ac8e-86198e5f1d34	0.001954764	0												Prostate
1f5e70c1-c5de-49e7-941a-46e11a4f4416	0.220336237	0.694	cant_be_determined											Prostate
289790a5-77bd-49a9-a1ec-478a8ecacd7f	0.005586121	0												Prostate
2c9c50ff-01d9-4703-931b-04119178706f	0.000619433	0												Prostate
2ea2294d-fab9-43ae-a222-370487495b06	0.000708027	0												Prostate
304c3e10-583c-421d-ab01-15c937d5014a	0.001888772	0												Prostate
32d8c373-b5c8-420b-9808-8812b5501649	0.000842086	0												Prostate
36962459-e81f-4b8c-a08d-df60ef3283a3	0.001289877	0												Prostate
39aee9fc-fa27-4b71-b9e8-43ff34bd3930	0.003177255	0												Prostate
39e32615-0160-4f13-b330-50748f5d87ed	0.002117802	0												Prostate
3c92c0e9-68e0-4354-8ed1-b6506878145d	0.00031547	0												Prostate
3e7a30e6-2202-40bd-bfc1-0383604050da	7.5e-06	0												Prostate
3e86e68b-d083-4450-b056-4cd0f8d4a084	0.000455014	0												Prostate
41027c0b-85af-4c78-bba0-0da63cd75fa9	0.003398217	0												Prostate
41c565a9-d44a-447f-85c0-98f23bfee1b3	0.000307784	0												Prostate
42a548f0-d86a-4273-8bda-be0fe6a53b20	0.002004673	0												Prostate
43b675e0-22e0-42d6-a060-afc93e22ac95	0.000705713	0												Prostate
44083f54-0953-48e3-a704-11ad0988ad2e	0.00107012	0												Prostate
4508ce0a-5a2e-4502-98e9-2fd76c4eebef	0.000470258	0												Prostate
45d0ccb2-641f-4348-b3a8-61f4113cd85b	0.001627956	0												Prostate
475bca00-9089-4f50-8638-4e5e8aca6dcd	0.000303478	0												Prostate
48c33a30-557b-4ecf-8066-5b4b068b5e3a	5.52e-05	0												Prostate
4b44b313-6f74-4233-bec4-7e41c91c77f1	0.00037009	0												Prostate
4c5228b5-bf31-4abd-a47c-d088e16dba13	0.000590242	0												Prostate
4eac784b-084a-4106-9a76-2d9fbec57033	0.000158865	0												Prostate
51adf6cf-f422-4d7e-aa46-cc9bf0ef8693	0.004284048	0												Prostate
54319e3d-c28f-4ba1-9c87-299d303e4de3	0.00056385	0												Prostate
551d5082-ab6a-4674-af0d-ce408f589949	0.002079826	0												Prostate
59938f45-3e57-43d6-af3b-bb4968249e5a	0.000541102	0												Prostate
59c18694-8a43-41dd-a6f6-52a20bc8dd54	0.001500432	0												Prostate
5c8da06c-7964-4ad1-ac9e-d1b5507105d2	0.000210784	0												Prostate
61973578-4c0d-4a3f-b9c4-f96ceab24629	0.002042756	0												Prostate
61a48c69-4f7d-4dc6-aff7-88a6c33137df	5.92e-05	0												Prostate
61d941f1-87df-43af-8a29-b6809c809275	0.001036005	0												Prostate
6218f366-d5d2-4289-a95e-eeedfae7523a	0.000432312	0.006												Prostate
62ea1264-47b6-4a6b-9fa6-779837f8e905	0.002279591	0												Prostate
6763f295-f2bf-4975-bea5-c1a490d9a1fa	0.000193488	0	cant_be_determined											Prostate
6947cd78-0a51-4949-8383-343f9122d953	0.000868366	0												Prostate
69dbe6ef-f5de-4c1f-b2f2-963dcb6ccd3e	0.000488822	0												Prostate
6d0851ba-271a-408f-bcc3-c104b452c9e5	0.004610136	0												Prostate
6d325c96-8f5c-4064-9806-4364016da8a4	4.22e-05	0	cant_be_determined											Prostate
6d936ef9-b5df-44d3-831f-528bf8ddc131	0.002054784	0.002												Prostate
6f25ca85-4b4a-420f-b0cc-5a4f65a97da3	0.000146836	0												Prostate
6fe135ef-54b4-4941-9bb9-872dc4d18d9f	0.001106788	0												Prostate
7181dd10-1371-4cb6-9219-a9542c62b854	0.000152431	0												Prostate
734a8251-9ecc-47f5-835f-846b67693ca6	0.001097347	0												Prostate
73f7718b-f9b1-4a63-a561-0c9cc2abeb9f	0.000238482	0												Prostate
783579bd-e29d-457c-8236-1a80b557600c	0.003294919	0												Prostate
79914ce9-04d8-4b0d-9f16-2e528044966e	0.000448783	0												Prostate
7a95af21-ca7c-4596-9c83-66d11ca0c417	0.000433503	0												Prostate
7d6fb1a7-7742-4b8c-9903-abff706240b5	0.001428439	0												Prostate
7dd2dc62-0eb4-4d45-86f1-e9e9377181ca	0.0090985	0												Prostate
7e4d570e-f26b-41fb-84c5-2a6f7d668bb5	0.000501997	0												Prostate
7fe96e71-436d-49d4-9e47-e104e1203568	8.94e-05	0												Prostate
8044a282-bc2c-47c6-8a85-53c3b5eeb08f	0.000260262	0												Prostate
836ec5a5-e385-4236-83e7-2641ee35db7f	0.182112044	0.284												Prostate
84ae4dd8-f661-46aa-9892-69742e2f3542	0.000552405	0												Prostate
86874a67-aa86-45f1-be32-3b2722ebedec	0.000517585	0												Prostate
8689b53c-8883-479c-85f6-d13b86272b5d	0.005345095	0												Prostate
887616c5-06a7-4e83-948c-3546202349fb	0.002514394	0												Prostate
8930735a-4eb4-4489-8513-d4b600c316ab	0.00155704	0.002												Prostate
8a9359de-b0ad-4a2d-a543-e3b982697db9	4.77e-05	0												Prostate
8bbe4006-be0a-4cd5-91f6-529100d4f06e	0.000682777	0												Prostate
8c0a7dfa-6ec3-4262-b718-c3605722df37	0.000396421	0												Prostate
8c850df7-d48e-4386-b3a5-cac5da865ea5	0.002125092	0.004												Prostate
8e7fe8bb-6b3d-428f-a232-97e6042a0f39	0.000439277	0												Prostate
90fd404b-f734-41ed-a601-0f30e43625fc	0.001658761	0												Prostate
96b67289-9c42-402b-8e30-9efb4d512bef	0.002224355	0												Prostate
982b58c4-02b3-4e7d-8af0-4b133d0c7e50	0.004097402	0												Prostate
98f54445-b151-4aeb-b8cf-91d743ba066e	0.000751369	0												Prostate
9ed8f0b9-d615-44c4-9ec9-e07ecd744922	0.000479136	0												Prostate
a08ec059-7592-4698-bb45-25a9c3680c23	0.000797127	0												Prostate
a1af7c42-47af-435c-bb51-b932a3cd7b91	0.001975633	0												Prostate
a319188c-6b80-4228-8f2b-8f423c0fcf97	0.038311325	0.608	cant_be_determined											Prostate
a6045753-60bb-4e65-bc89-1ef0b47aab35	0.000906553	0												Prostate
a6d8467e-88e3-4ea5-8583-61c5ab9747ae	0.000481879	0												Prostate
a971ac23-0664-405d-9f5c-9ca892af003e	0.04375554	0.656	cant_be_determined											Prostate
a9ec7d9e-b179-4782-a589-43c7d1642be9	0.000339389	0												Prostate
acb9750e-7e17-4cef-bee1-5d710f9bf3a7	0.001753525	0												Prostate
b0c61486-b061-4b6b-ac02-130a3ea0b080	8.94e-05	0	cant_be_determined											Prostate
b1f2442f-a973-47b4-9891-f028f0d44adc	0.003964586	0												Prostate
b33b7c8f-0b0d-4009-88a7-48e9d9cae6cb	0.000422702	0												Prostate
b3f1d232-4392-4258-9256-d38ff4b59f94	0.102920494	0.458												Prostate
b41c63e8-bb85-4f83-9bc6-e611fd9ef075	0.00397179	0												Prostate
b4aea804-fc6e-4d58-906f-f3a932ca9dc5	0.000903953	0												Prostate
bb02202f-d140-4bec-95ce-5c2b117a2167	0.00040042	0												Prostate
bc9f105f-6d99-44ac-9871-67defd5e85cd	0.000412975	0												Prostate
bd3028c7-1fde-401d-a6b2-5f8e61eb4aa1	0.002917506	0												Prostate
beafb7c6-ef39-478e-aa47-0f1ad39f95a3	0.000276649	0												Prostate
c08f65a0-bf4c-462e-9d07-ad56b3adcac8	0.000309853	0												Prostate
c14b2c74-447b-4526-a6e9-415d2728c7ca	0.000918675	0												Prostate
c6a28615-1b92-4085-956e-eeedb2573c03	0.000623376	0												Prostate
caf2e99d-8f1f-4043-b567-c3fe28dc33ac	0.000104147	0												Prostate
cd0c3b1f-c73a-4991-8724-4e74381900cb	5.23e-05	0												Prostate
cd29af7e-d670-4d8e-83e2-da6e52abda71	0.009900657	0												Prostate
d0f4dd92-a63b-4766-8889-5327fca1bd91	0.002486089	0												Prostate
d1875ee6-6677-4117-a7a8-930ab5cde775	0.002788131	0.002												Prostate
d277e679-9fdd-44cd-9f2c-f9927e44d721	0.000964831	0												Prostate
d709d214-02ee-46c1-a73a-e7074cb2623e	0.000945217	0												Prostate
d74be531-b0fd-42c3-954e-4a4f7eef922a	0.006221264	0.016												Prostate
dbfdb5c6-f52e-48f3-87e7-fb922df9e7a9	0.000538828	0												Prostate
dc85552c-2488-48d9-9da1-67a380945b85	0.000348844	0												Prostate
dcc938da-3e45-4c2f-ae0f-47817be04518	0.000279389	0												Prostate
dd5ed858-0623-4387-b1bf-109175c32ef4	0.00013692	0												Prostate
de4faf55-1bcf-427f-b019-829bb4b64ff1	7.25e-05	0												Prostate
e41bc2ec-3e0b-4c37-806b-3f6f25c8c4db	0.000161001	0.054												Prostate
e6772001-dffc-4fb4-86e9-6c395edd176d	0.005996808	0.002												Prostate
ec16d1f5-f8a9-4c19-8cce-92f6ea9eb3f7	0.000306912	0												Prostate
ed7be9ae-e603-4731-8d91-a8285abaee33	0.000621338	0												Prostate
edeea137-080d-42d3-a0ce-5cfe0d4a68e7	0.041419597	0.198												Prostate
f0f2030e-17fd-4dd9-9104-899e59d72ed8	2.81e-06	0	cant_be_determined											Prostate
f1534b2a-5350-442c-bb9d-8c7142668d31	0.000311272	0												Prostate
f3720205-dc76-4101-8a56-72043fc896b5	1.15e-06	0	cant_be_determined											Prostate
f5378545-17d4-4a64-a57e-f6c91ef4cb3a	0.000522379	0.002												Prostate
f601cf2f-081f-484d-ab0e-21a8ec8d3770	1.7e-05	0												Prostate
f640d377-98e9-41d3-8761-61eb33072c65	0.000162664	0.004												Prostate
f7cc504a-37c9-45f5-b50d-599c54dca157	0.000952678	0												Prostate
f8a165b0-51df-413c-b7c6-c7fc80547db4	0.003195381	0												Prostate
f921b592-fa4d-49f7-b773-81a0e903aaed	0.005413114	0												Prostate
f9c07ba7-152a-f624-e040-11ac0c484cd5	1.32e-06	0	cant_be_determined											Prostate
f9c0a08b-d1e5-4c18-e040-11ac0c4864df	0.001779788	0												Prostate
f9c0a0d9-5af6-4476-e040-11ac0d4830d3	0.005076803	0												Prostate
f9c0a12c-2651-d9ea-e040-11ac0d483201	0.002801644	0												Prostate
f9c1df10-25b8-c8ae-e040-11ac0d486375	0.002731066	0												Prostate
f9c23ce8-7f1c-9417-e040-11ac0d482562	0.00070971	0.002												Prostate
f9c23d09-74e4-07f9-e040-11ac0d482577	0.008887506	0.006	cant_be_determined											Prostate
f9c26646-d2b0-cf30-e040-11ac0d483918	0.009051669	0.002												Prostate
f9c39eb7-39a9-6626-e040-11ac0d4870c2	0.000614082	0												Prostate
f9c3bc8e-dbc4-1ed0-e040-11ac0d4803a9	0.000390722	0												Prostate
f9c3e4e3-1b95-b71a-e040-11ac0d4819e7	0.001551077	0												Prostate
f9c3eaad-a0d9-8bf8-e040-11ac0d481d8e	0.00198354	0.002												Prostate
f9c4e06c-e8a6-613b-e040-11ac0d4828ba	9.68e-05	0												Prostate
f9c51617-3fcb-91c5-e040-11ac0d484abf	0.001414894	0												Prostate
f9c650e7-9053-78eb-e040-11ac0d4874bb	0.00132438	0												Prostate
f9c65e3d-f3f7-dd5f-e040-11ac0d487b1f	0.006888591	0												Prostate
fc9d5fc6-719b-0525-e040-11ac0d485f83	0.001563147	0												Prostate
fc9d5fc6-7f7d-1313-e040-11ac0d485f85	0.001127206	0												Prostate
fc9d93b6-92e8-acb7-e040-11ac0d487dee	0.004420266	0												Prostate
fe083d2d-d088-4ac1-825b-8c5bbfe974ac	0.000331857	0	cant_be_determined											Prostate
ff870342-f0d6-4450-8f9c-344c046a0baf	0.00020044	0												Prostate
003819bc-c415-4e76-887c-931d60ed39e7	4.6e-05	0	cant_be_determined											CNS
0040b1b6-b07a-4b6e-90ef-133523eaf412	0.007594577	0												Liver
005794f1-5a87-45b5-9811-83ddf6924568	0.001943997	0												Kidney
00b9d0e6-69dc-4345-bffd-ce32880c8eef	1.61e-05	0												Lymphoid
00c27940-c623-11e3-bf01-24c6515278c0	0.060729656	0												Liver
00db1b95-8ca3-4cc4-bb46-6b8c8019a7c7	0.004121697	0.004												Kidney
0168a2a6-c3af-4d58-a51c-d33f0fc7876d	0.003349572	0.006												Kidney
01dc6872-c623-11e3-bf01-24c6515278c0	0.002271448	0												Liver
02078f77-2b35-4fa3-ab02-2c017181295e	9.84e-06	0	cant_be_determined											CNS
0250e6f7-2538-4d1f-a8ff-ca34a7057dde	0.009243148	0												Esophagus
02706819-bcab-4c49-a569-a4a8c60db1c0	4.91e-05	0	cant_be_determined											CNS
02917220-6a7a-46a1-8656-907e96bef88e	6.6e-05	0												Lymphoid
0292a46f-a282-4b7f-a7d6-ac55cc7324fb	4.48e-06	0	cant_be_determined											CNS
030695f6-c623-11e3-bf01-24c6515278c0	0.414835277	0												Liver
031962d6-fc7d-4c6c-9d47-ffa45997b249	0.00785477	0.002	cant_be_determined											CNS
03ad38a6-0902-4aaa-84a3-91ea88fa9883	2.8e-05	0.002												Lymphoid
03b5268e-881e-49e7-824f-170c3fc8b11b	0.006675938	0												CNS
041e3b42-c623-11e3-bf01-24c6515278c0	0.001767682	0												Liver
04b570c2-3224-4e9b-81cc-089b4a7ff07a	0.000392767	0												Lymphoid
04b9837e-9ab5-4eb9-9a9c-ef49e3a62662	0.00231958	0.002												CNS
04db8bef-8777-48ac-bc2e-3c9acb103f48	0.003019207	0.01												Kidney
05616329-e7ba-4efd-87b1-d79cd0f7af3d	6.03e-05	0												Lymphoid
05da3161-1444-4188-914d-19762de3a443	8.03e-06	0												Lymphoid
06018aae-1107-4899-bd24-14e6b1f94709	0.000294788	0	cant_be_determined											CNS
0609b182-0396-4755-b463-10f949c5b8bb	0.000630666	0												CNS
0624eb1d-3aff-4037-a3c5-fc363a9edd02	0.000128621	0.092												CNS
062e96d4-c623-11e3-bf01-24c6515278c0	0.002957003	0												Liver
068f4f69-d2fe-4f25-912e-ca7d4623efb6	0.000454727	0.028												Lymphoid
06ecd127-6c24-422d-a7fb-bf5aee1b8b7b	0.291896305	0												Liver
07835447-5d7e-4828-80fd-89b063989c9a	0.007981543	0												Lymphoid
0831e45e-c623-11e3-bf01-24c6515278c0	0.052622744	0												Liver
08b5d0e4-4661-460e-a9f7-f2e687414711	5.25e-05	0												Skin
08d2a566-8407-4e9b-836c-bf5e1e9f85b2	0.001305535	0.32	cant_be_determined											Stomach
08f7812b-0d74-42ba-985b-d0a027e8a80c	3.46e-05	0												Lymphoid
09497b9b-6fca-48cb-af97-161a3e434a51	0.020766977	0.002												Esophagus
0a9c9db0-c623-11e3-bf01-24c6515278c0	0.001708628	0												Liver
0ab4d782-9a50-48b9-96e4-6ce42b2ea034	0.000145535	0												Skin
0b6cd7df-6970-4d60-b7b5-85002a7d8781	1.68e-05	0												Lymphoid
0ba8f2e2-935a-4123-86aa-6e7f5de85bf4	0.000834305	0.048												CNS
0be08326-c623-11e3-bf01-24c6515278c0	0.012225894	0												Liver
0c8f7e63-7a3e-42e8-9408-c5cbd2f52f9d	7.53e-07	0	cant_be_determined											CNS
0cdbabf2-c623-11e3-bf01-24c6515278c0	0.008187888	0.002												Liver
0d569bd5-418d-4d72-87ca-8e14668c2119	0.000921039	0.002												Lymphoid
0db9309e-7b95-4ae3-b0ed-dfd4f38d11b0	0.000359858	0												CNS
0dd39eca-c623-11e3-bf01-24c6515278c0	0.005607469	0												Liver
0e1e628b-823a-4861-aa95-bed2fada7349	4.75e-05	0												CNS
0e54cea2-d568-4a33-b9db-b698844e6ad9	0.005052846	0												Stomach
0e7f46ca-6f5c-4538-b6d6-00af65d57fcf	0.000114206	0												Lymphoid
0e872e0d-4711-4364-a5d0-6beeb6fd3ff2	0.001086352	0												Esophagus
0eeafcd6-c623-11e3-bf01-24c6515278c0	0.238009515	0.004												Liver
0ef92ff8-829f-425a-91d8-c594b6e22a2b	0.000153042	0.004												Esophagus
0efb6e20-236d-4640-9373-6fc03e67d090	1.82e-06	0	cant_be_determined											Esophagus
0f9e70b3-24cf-4d76-af7b-84ace66ec5a7	0.050052572	0												Head/neck
10136472-c623-11e3-bf01-24c6515278c0	0.000586301	0.006	cant_be_determined											Liver
108749d2-5c62-4ef1-92df-aec6941ba53b	0.000360074	0												Skin
10cb8ac6-c622-11e3-bf01-24c6515278c0	0.208976097	0												Liver
11473a98-d953-45f9-abf5-709b68a4bae8	0.006227384	0												Liver
1157a548-6770-4c89-a84c-bcf6f0e96ea8	0.000237158	0.002												Lymphoid
1193a9c4-5aab-4cd7-a690-60c96bd1172d	4.23e-05	0												Lymphoid
11ae45fb-05f6-425a-9295-d50d13407006	7.8e-07	0	cant_be_determined											CNS
124d5b04-4588-44c3-9c00-61e064cf1bdb	0.000527796	0												Lymphoid
1295947c-c623-11e3-bf01-24c6515278c0	0.029740917	0.25												Liver
129d2c6c-6688-4b29-bfa7-8df3fe77b25a	3.25e-06	0	cant_be_determined											CNS
12ae2ba1-9484-47fe-8a3f-bba94a6abe0c	1.9e-05	0	cant_be_determined											CNS
12d7121a-0345-4808-a819-09d6e3227bd5	0.000164656	0												CNS
12f1ae2f-2666-45be-9742-f502d212373d	6.26e-05	0												Skin
132f7f2a-b902-4343-aa08-cf6a7af10b9a	0.000665795	0.004												Lymphoid
13446fc4-9fa6-4bb3-a00a-b9265b41eb12	0.000871737	0.002												CNS
134c9a92-e91e-4347-a9c4-727279edebb1	0.001739347	0												Esophagus
1358ff92-4db9-4e42-b63a-984a7bea425a	0.002037592	0.632	cant_be_determined											CNS
13bd2b30-c623-11e3-bf01-24c6515278c0	0.030405447	0												Liver
13c62975-9f5e-4d40-a461-dceab08a31ec	0.076284333	0.008												Skin
13c7065e-6780-4571-978e-a7c13078ff50	0.000184974	0												CNS
140d5fa9-afbe-444e-a7e7-6a4cb4ab2923	0.000217457	0												Lymphoid
140d6ef7-0217-4d16-9add-215d0d14ba06	6.79e-05	0.05												Lymphoid
141918cd-3e23-45bc-96e1-b208c80f69e7	0.001565708	0.004												Kidney
145f6dbb-9744-44f7-8485-e440689de3fd	0.063975098	0												Liver
147e3496-514e-4da7-be42-7cd9be78ed04	6.47e-05	0												CNS
1494bb16-f1f0-42a4-b10e-c383574cbc8b	0.003193434	0.056												Lymphoid
14cbcbb1-028b-471a-bb4f-8b29cfa5e4eb	0.001553085	0												Lymphoid
14f41457-25c3-4979-8515-4f33322039a5	0.000497306	0	cant_be_determined											CNS
15563a10-47a8-401d-a507-2c7101f7ae60	5.07e-05	0												Lymphoid
155873b2-e5de-405f-87f6-6de0d238b160	0.00051875	0.006												Kidney
15678c3d-ce61-454d-849e-1d4ca358909b	0.000502979	0												Lymphoid
15895218-c623-11e3-bf01-24c6515278c0	0.813570417	0.094												Liver
15a93657-0521-430a-a816-bf0842374b75	0.002011878	0.018												Kidney
15e7d981-8c27-4b2b-b4f8-626e22021895	0.081587587	0.044												Esophagus
15fd8dc8-c622-11e3-bf01-24c6515278c0	0.029250535	0												Liver
16d5519e-ecb9-4fc8-81f1-e0e4adf722a8	0.000172759	0												Skin
17de5b12-c623-11e3-bf01-24c6515278c0	0.097767159	0												Liver
18f5e75e-c623-11e3-bf01-24c6515278c0	0.030886654	0												Liver
18f9240e-7acd-41eb-a154-c2a67a1cbe9b	0.00017605	0												CNS
19085f7d-e6a6-406f-bd09-520a27e0283d	0.216970983	0												Liver
19aa8223-ee84-4b5c-b11a-6ca2a2680b3c	0.000122676	0												CNS
19b6b9d6-6912-4b85-a4bf-52014bcb170b	2.44e-05	0												CNS
19cd4360-8392-4bc2-ae88-fdc1335d886b	4.91e-05	0												Lymphoid
19fe27d8-c623-11e3-bf01-24c6515278c0	0.001505196	0												Liver
1a134c18-ced3-4bae-9f15-5f0f09526639	6.59e-05	0	cant_be_determined											CNS
1a391468-fbf3-451a-b88e-a257a26d047f	0.055321402	0												Stomach
1a4633c4-72a0-4e30-8c4c-345e04337627	0.001385991	0												Lymphoid
1ac15380-04a2-42dd-8ade-28556a570e80	0.010140413	0												Skin
1b06afe2-c623-11e3-bf01-24c6515278c0	0.00042654	0												Liver
1b8fe07d-859c-4d91-ade1-6b2bcb5774ce	0.010360548	0												Stomach
1bb2bdb7-8a89-4e7d-903d-03a6f8018efb	0.00059681	0												Esophagus
1bd74f92-47f6-427e-af6f-299c3a7fe023	5.59e-05	0.002												CNS
1bdfaa8a-1b7e-4251-b135-ce5e4568371b	0.000341758	0.002												Lymphoid
1c10ab52-01a3-11e4-8395-af1f6b7ba88c	0.015474544	0												Liver
1c1c6494-c623-11e3-bf01-24c6515278c0	0.001879042	0												Liver
1c300960-e51c-4477-8fdd-026c7e545dc4	4.11e-06	0												Myeloid
1cb25b72-3726-4f12-9e22-f5c7e4b05681	0.014410732	0.002												Liver
1cd0acf2-3116-4dfa-a063-0a435b9f6da3	0.004199226	0.002												Skin
1d1eeba2-4d7b-4380-b0b6-26d246bc4158	5.77e-05	0.018												Lymphoid
1d2d355a-8409-4c8a-9f07-ac62885e228d	0.049243256	0												Stomach
1d325d84-a3a0-4802-9842-76cb21cecb1c	0.001757458	0												Kidney
1d4a091d-fe65-49c0-8810-5a95243b108a	0.00061047	0.002												Skin
1daefc49-5248-4948-87ce-0ec19a248ef9	0.000667903	0												Skin
1dbdbb2c-c623-11e3-bf01-24c6515278c0	0.028341278	0												Liver
1de83d45-8492-4b83-9055-a9f43b823f91	7.97e-05	0												Lymphoid
1df8939c-c622-11e3-bf01-24c6515278c0	0.001576662	0												Liver
1e2dcbcc-771c-43c5-8c8d-e0eb77cb3494	0.002009457	0												Biliary
1ea7e01c-c623-11e3-bf01-24c6515278c0	0.012570146	0.002												Liver
1f8d8720-30ca-4057-90f7-a34b8383eafe	0.000558766	0.002												CNS
1fd69adc-c623-11e3-bf01-24c6515278c0	0.011187138	0												Liver
1fdab6a6-7346-4229-aa8d-5dbd258f0c60	0.405144796	0												Head/neck
1ff155dd-deb4-44e0-b3a2-e4875b618435	0.070560963	0.002												Head/neck
2009e5e7-1796-445b-8677-46b3804fe0bf	0.001702387	0.002												CNS
209a9b10-7129-48fe-a899-d14ba17efe6f	0.000194702	0.044												CNS
20e02396-e676-412d-9724-44a428919cdb	0.060850024	0												Skin
2109e1d4-c623-11e3-bf01-24c6515278c0	0.008593172	0												Biliary
21e7e43e-f9b1-4351-a6d9-b9cd06d15f68	0.000147752	0												Lymphoid
221d0290-c623-11e3-bf01-24c6515278c0	0.072813203	0												Liver
22578b9f-78dc-464c-9bb9-382f033283d0	1.87e-05	0												Lymphoid
22cd3875-a123-4f0d-8cd1-371958208ad6	1.04e-05	0												Lymphoid
22d67778-61fc-4f15-95b8-7e7c6cc7112b	4.08e-05	0												Skin
2316ee90-c623-11e3-bf01-24c6515278c0	8.19e-05	0	cant_be_determined											Liver
2321c412-7730-4694-bc8f-199d7e51a7f8	0.00125201	0												CNS
232b7754-b3c3-4530-9d24-3af40d9b2816	0.000144394	0												Lymphoid
23eb72d8-c622-11e3-bf01-24c6515278c0	0.003238577	0.002												Liver
23fa90d5-b273-4e2c-9c88-68aa57b60e97	0.001018195	0												Esophagus
2439ec74-1713-4d47-a5d9-886f69dddcb6	0.00016327	0												Lymphoid
2468e58c-c623-11e3-bf01-24c6515278c0	0.246860882	0												Liver
25103371-28ac-4f43-b0e2-2d376d0dcb84	0.000947767	0												Skin
2572b0bc-c622-11e3-bf01-24c6515278c0	0.000719602	0												Liver
2584b428-c623-11e3-bf01-24c6515278c0	0.013647334	0												Biliary
25c99312-bf63-4654-a73a-03c3c1cd50b6	0.012586508	0.02												Esophagus
25e20393-752b-4796-9001-0e22ee04c586	1.74e-05	0.012												Skin
25e68b09-7d62-4449-a14a-8d09edd96db6	0.001134174	0.614	cant_be_determined											CNS
25f07374-313a-4100-9a60-3d21d2988fca	0.001867575	0												Stomach
26c301a6-a597-4c24-9f6c-2293e5ae41c7	0.000161706	0												Lymphoid
27847313-3b1e-47f2-84f1-acadaf265cf3	0.000471946	0.002												CNS
278b2498-1d64-493b-ac43-3489ec86f313	0.001591594	0												Lymphoid
2790b964-63e3-49aa-bf8c-9a00d3448c25	0.002074398	0.014												Skin
27b56bf2-7a9d-4061-98d4-61fe2761578c	7.01e-05	0												Esophagus
27fcccdc-c622-11e3-bf01-24c6515278c0	0.000886816	0												Liver
2828e5e6-c623-11e3-bf01-24c6515278c0	0.002535277	0												Liver
282b45ee-4af2-4c61-9acc-286eaf8d661a	0.025462447	0												Lymphoid
28839c75-90a8-493f-b658-8c63e0ebd324	0.001912584	0.002												Skin
28e81540-4744-4865-b627-c7c9d8a3c2b8	0.002062537	0												Esophagus
28f8d45f-4763-472e-9c4d-6787ba00164b	1.55e-06	0												Lymphoid
293a2f0a-4846-4c7c-b8b1-bb741c8d3275	0.000755688	0												Esophagus
29548b5f-c88a-4908-8c46-e86483e75067	0.004678845	0.046												Kidney
295aac88-c623-11e3-bf01-24c6515278c0	0.56675294	0												Liver
2a5a5840-a834-47a1-b1f4-dc8fed620f5c	3.5e-06	0	cant_be_determined											CNS
2a7f6aac-8f94-4815-8b94-0ea7db71135c	0.002088012	0.004												Lymphoid
2abe2e53-ad9b-4fbc-b9a7-93444f1bea87	0.000614647	0.002												CNS
2b02e3ad-4423-491e-993a-561e80dc7bcf	0.000114467	0												Lymphoid
2b36ac4b-eed3-4591-8b4f-b44049dfc5ed	1.57e-05	0												Lymphoid
2b41746a-95c0-4875-afb5-c6d3d3ad30d9	0.010753017	0												Esophagus
2bd56bba-c623-11e3-bf01-24c6515278c0	0.000204258	0.002												Liver
2c2e5f87-bd22-4a5e-be71-3bcc2aefaf74	3.75e-05	0	cant_be_determined											CNS
2c3ada8b-9650-4859-9857-43209c0f7cea	1.11e-05	0												Lymphoid
2d0e4b82-c623-11e3-bf01-24c6515278c0	0.007094674	0.002												Liver
2df17728-33e8-45ab-833b-ef68a5482daa	0.000255603	0												Lymphoid
2e0bbaf6-c623-11e3-bf01-24c6515278c0	0.004527363	0.026												Liver
2e76891c-b620-4cc0-9315-6f1217b09b1e	0.000296893	0												Skin
2ecd8358-c622-11e3-bf01-24c6515278c0	0.064195846	0												Liver
2f0a660c-ba3c-49bb-90f7-39b0034cea82	3.44e-06	0												Lymphoid
2f149d78-c623-11e3-bf01-24c6515278c0	0.001023195	0.002												Liver
30376989-7edb-4863-9496-1789eccef8c4	0.000833039	0												CNS
30600994-c1ec-44c9-a620-3f6c617eb928	7.43e-05	0												Skin
30a8f292-c623-11e3-bf01-24c6515278c0	0.001839523	0												Liver
30b9ab02-60f2-4974-85a9-874f247ae932	0.015170004	0												Stomach
3166f1ae-678d-42ae-9d44-d3d25d6860c7	7.39e-05	0.004												CNS
31bcfd64-c622-11e3-bf01-24c6515278c0	0.001077575	0.002												Liver
31c0c8f8-c623-11e3-bf01-24c6515278c0	0.000949383	0												Liver
31f3ff14-7d74-447c-a5da-9ad8336c3f3f	0.017213313	0												Esophagus
3232f77f-b745-4232-a802-6699b6356efd	0.003473226	0.002												Kidney
324adcfa-3fba-45b9-99f0-9d41c0c54d79	4.22e-05	0	cant_be_determined											CNS
32a63b4f-3baa-4987-ad30-5bd0c0548088	1.57e-05	0	cant_be_determined											CNS
32be40fa-c623-11e3-bf01-24c6515278c0	0.018906092	0												Liver
335c721a-3653-471f-b0ec-6144fe868c6a	6.95e-07	0	cant_be_determined											Myeloid
33992441-4f34-42f2-ba87-6ddd227f2250	0.015055919	0.004												Esophagus
33a8693c-c623-11e3-bf01-24c6515278c0	0.000798449	0												Liver
33bf46dd-16b3-49c6-80d7-76caf27aa0f4	0.003259654	0.002												Kidney
34030a28-c622-11e3-bf01-24c6515278c0	0.000368556	0												Liver
3433b1f3-59d1-4ac2-9bbf-e0c4042b4ddc	0.003045749	0.002												Skin
34a445c2-1eb4-4a9f-8838-cddc2f82aae4	0.004568708	0												Stomach
34ab4c57-5240-4af7-a329-a5ab55934fd4	0.004864266	0.002												Kidney
34b0c838-bf6c-4d0f-8cd2-d2928adbb539	0.001049845	0.002												CNS
34c24482-c623-11e3-bf01-24c6515278c0	0.00053259	0												Liver
351db483-a70e-496d-b70a-7449875121ee	0.001078307	0												Skin
35a74e53-16ff-4764-8397-6a9b02dfe733	0.006322696	0												Skin
35b951c0-edb0-47c4-9076-ede346ea7cb1	4.75e-05	0												CNS
35cca3b8-c623-11e3-bf01-24c6515278c0	0.392893455	0.002												Liver
35dc84c1-476c-4d48-ae23-622bf6e043ac	0.008445773	0												Esophagus
35e33a7a-c622-11e3-bf01-24c6515278c0	0.024057273	0												Liver
35eb6ecf-9514-4416-94b1-02200c0a1571	0.006529986	0												Esophagus
35f82a33-bde2-47e2-8aba-ff1fd5920219	0.002658802	0.002												Liver
36160be6-368f-4cdb-b1ee-9ed5b64462fa	0.001833886	0	cant_be_determined											CNS
363d3a59-dce3-408d-a736-5c29ba9f9b6d	0.000428251	0	cant_be_determined											CNS
367fdef3-d7af-4996-932f-cc5087e843dc	0.000234024	0												Lymphoid
36d9c1aa-c623-11e3-bf01-24c6515278c0	0.04813856	0												Liver
371235d9-55b8-40a7-8cd6-baa7c2ad0493	0.003935852	0												Esophagus
37c913e6-9ce5-4338-8849-b5bf7862d36a	7.54e-05	0												CNS
37e5d47b-851b-47de-ba6a-fd2835644011	0.00016139	0												Stomach
380593d8-c623-11e3-bf01-24c6515278c0	0.015162583	0												Liver
384ef419-ee94-4563-9237-236fddeb4b64	0.001288446	0												Esophagus
38d8e626-c622-11e3-bf01-24c6515278c0	0.044534653	0												Liver
391a949d-217a-472c-a6d4-80e548039684	1.51e-05	0												CNS
3935af50-d992-4430-9909-e688347aead9	2.37e-06	0	cant_be_determined											CNS
39458b0e-c623-11e3-bf01-24c6515278c0	0.014584926	0.004	cant_be_determined											Biliary
39a5d94d-e8c8-4057-be96-362ffbafb94d	2.86e-05	0												Lymphoid
39c476fd-273b-4136-874c-53352f1be008	0.001193288	0.002												Skin
3a18aa52-b6e2-4d03-ad05-ef99d653f0e0	0.000359359	0.002												Esophagus
3a49a936-c623-11e3-bf01-24c6515278c0	0.002909197	0												Liver
3a551616-4840-4111-a8c5-b4aa773d82c2	0.066393259	0												Esophagus
3afae3fb-2d87-4724-a589-d31cce1f4c28	0.000846635	0.01												Kidney
3afb3f57-545a-4ed5-9461-2fcb28d89399	0.005234548	0.004												Kidney
3b02a7a7-e5bc-4e77-b691-521603630b00	0.679034769	0.006												Liver
3b41cb48-c623-11e3-bf01-24c6515278c0	0.379958463	0.002												Liver
3b4ff158-c6d8-4a26-9568-0634ddb4a609	4.44e-06	0	cant_be_determined											CNS
3b55c58d-f95a-4a1d-9aa1-8d2c026656a9	0.000224967	0												Lymphoid
3b590d75-ccfb-4da8-a2e9-10fb07e02cea	0.000742098	0												Esophagus
3b7810f7-f8ff-4d62-b766-3ba06170194c	6.86e-06	0												Kidney
3baecfba-6977-4374-8bc9-22240abad9b5	0.033006172	0.64	cant_be_determined											CNS
3bb4c27b-4d0d-4d13-b910-41a9ebf95880	0.002797429	0.002												Esophagus
3c30b10e-c623-11e3-bf01-24c6515278c0	0.000155279	0												Liver
3d400522-c623-11e3-bf01-24c6515278c0	0.038893694	0												Liver
3da169e8-844a-4eee-b794-a2eb81db779a	0.014725295	0												Esophagus
3de261ea-6478-4f96-8ca1-30be130e945f	0.009306471	0												Lymphoid
3e012b50-06d1-4120-971b-5e54139b00ee	6.97e-05	0.002												Lymphoid
3e1180a5-149c-4e6c-9a29-696e3ba567e3	7.57e-05	0												CNS
3e2a85d0-c622-11e3-bf01-24c6515278c0	0.003583925	0												Liver
3e68233a-c623-11e3-bf01-24c6515278c0	0.058335429	0												Liver
3e6a17f9-c249-41b6-ba49-55aaa39d21c5	0.000155334	0												Esophagus
3e7ccab5-5b1d-4147-b907-77cab8f0837e	3.31e-05	0												Lymphoid
3e8a2c90-e747-4a22-bc9e-0b062479fec2	3.2e-05	0.064												Lymphoid
3e94aa64-7dd3-4d63-a5de-b4050d3dfafa	1.85e-05	0												Lymphoid
3ee54a3c-69ba-479a-b1fe-79917e1b6dd5	0.000716194	0												Lymphoid
3f3aff50-d71b-44af-85d4-f81e813ea420	0.000961995	0												CNS
3f72f750-5666-44e7-acaf-a912d89475be	0.000473293	0												Lymphoid
3faeb03e-c622-11e3-bf01-24c6515278c0	0.00023675	0												Liver
40b1e928-c623-11e3-bf01-24c6515278c0	0.00286679	0												Liver
41dba8d1-8aad-474c-a82b-20b28ab818bd	0.003344402	0												Lymphoid
41de507a-c623-11e3-bf01-24c6515278c0	0.57490741	0.01												Liver
4255582e-c622-11e3-bf01-24c6515278c0	0.415784588	0.022												Liver
42629ae0-9410-4fac-8df1-2c276467deb5	9.35e-05	0												Esophagus
4283773c-c04b-4f33-a398-f3566f6d293a	7.35e-05	0												Esophagus
42e92d78-c623-11e3-bf01-24c6515278c0	0.121630382	0.002												Liver
43206cb7-787d-4f68-8019-55e8585c4b4d	0.002744508	0												Liver
436af904-65b2-4196-ad8c-a4e98081ee41	0.001664963	0												CNS
43bf37e0-3dbc-4360-818c-fc1356d77495	2.17e-05	0	cant_be_determined											CNS
43d630aa-3890-401c-bf56-e3a9f325734f	0.000178131	0												Lymphoid
43dadc68-c623-11e3-bf01-24c6515278c0	0.11285938	0												Liver
446437de-c622-11e3-bf01-24c6515278c0	0.009879949	0.002												Liver
44e4f08a-c623-11e3-bf01-24c6515278c0	0.000232099	0												Liver
45348eff-4b09-4776-825e-b18de9dba937	0.004287862	0.008												Kidney
45614404-2149-4468-848c-0796e3757d62	4.97e-05	0.054	cant_be_determined											CNS
45aedf22-c622-11e3-bf01-24c6515278c0	0.153453183	0												Liver
461df2ae-fcf1-4b93-be0a-c14954fe7c42	0.000152625	0												Lymphoid
468083cb-95c3-47c1-9d96-79bcf7bf3f26	0.010823568	0.016												Liver
469eddf2-6e02-46bf-820f-6296a2b776e2	0.0001605	0.006	cant_be_determined											Head/neck
46e503ae-461d-443a-869b-f261c5570de1	0.00016855	0.014	cant_be_determined											CNS
47050918-c623-11e3-bf01-24c6515278c0	0.000509256	0												Liver
47874ff4-0b1c-4a31-9192-2a10e93ce9a1	0.008274168	0												Esophagus
47d77750-c622-11e3-bf01-24c6515278c0	0.888978067	0.006												Liver
4808f9e1-452d-45eb-9b87-2f87c67d3452	0.005542464	0												Lymphoid
48624a82-c623-11e3-bf01-24c6515278c0	0.001067017	0												Liver
48a0da38-8147-40fe-b683-3f070413a792	0.011164918	0.038												Esophagus
48fadd0f-6561-4294-bff4-d5e4f7dfe79f	2.68e-05	0												CNS
492694a7-bb41-4128-a909-c424e7fc0c9e	9.5e-05	0												CNS
494701ce-05d4-440b-a65e-d925902b9d42	0.001159494	0.014												Kidney
49795e42-c623-11e3-bf01-24c6515278c0	0.042728704	0												Liver
498ecf81-921d-4df9-a6a4-a625f484e823	1.12e-06	0	cant_be_determined											Stomach
49900a43-d42e-4052-a8cb-1563b82ad0a0	7.37e-07	0	cant_be_determined											CNS
49ad3c8d-88cd-43cd-a273-1623fe2aec0b	0.003292918	0.084												Kidney
49b26ab5-2ca9-49b1-ae83-573fa41af2cd	2.19e-06	0	cant_be_determined											CNS
49fa7e44-c86f-4b1f-8849-e5fe5b9de734	0.008294237	0												CNS
4a35b01f-5e19-4673-abea-d87fd1d605d0	0.001998615	0	cant_be_determined											CNS
4a4309b0-2aca-4d6a-ac50-039b28406bba	0.000145505	0												Lymphoid
4a698352-25e6-4137-bef8-b6520d5b1b95	3.86e-05	0.002												CNS
4a703d3e-c623-11e3-bf01-24c6515278c0	0.027397368	0.002												Liver
4adc846a-42cb-4ebd-a954-e31eb29d7572	0.000203053	0												Lymphoid
4b7a704b-e516-4275-be11-45cc935237e2	8.75e-05	0												Lymphoid
4b8c6b0c-0d0c-4834-a2f3-691e0919b902	0.000724717	0												Lymphoid
4b91ece6-c9b2-4889-b18c-c63eb58eb061	0.000318027	0.016												Lymphoid
4c183106-c622-11e3-bf01-24c6515278c0	0.120075987	0												Liver
4c3f733d-5fd5-4f67-af5f-8c36c5b37be2	9.14e-05	0	cant_be_determined											CNS
4c8afa82-c623-11e3-bf01-24c6515278c0	0.311664679	0.004												Liver
4ceeb025-2f16-4f80-b9b4-0151346349c6	9.77e-05	0.004												Myeloid
4d121008-0987-4142-a2b8-7dac58f3110a	0.000399588	0												CNS
4d1a4587-adb4-4a65-943e-f19efe8de142	2.82e-05	0												Lymphoid
4d690424-b015-46ae-885d-aa6d9031f66f	0.000476168	0												CNS
4d6bb438-86f0-4414-962f-2b1cebee4524	0.002888202	0												CNS
4d72d06d-b6af-4294-9eef-6e61e067761f	0.000776897	0.002												Lymphoid
4daa2708-d0db-40fe-a07a-763f003adcae	2.49e-05	0												CNS
4dac9498-c623-11e3-bf01-24c6515278c0	0.012293377	0.002												Liver
4dc9b032-7f7b-486d-a12b-8461af89501d	0.06710561	0.178												Stomach
4de7441f-a609-4a75-9fe7-17a647079ac1	8.38e-05	0												Lymphoid
4e7cdeda-6dc1-4f17-b853-72a68e5aa7e1	0.000164591	0												Lymphoid
4e7e6e1f-c648-446f-bdf6-0b1fcc6dfa83	0.000535841	0												Lymphoid
4e8396f7-9506-4401-96b6-bb2e89557d59	0.000121245	0												Skin
4ed52e0c-c623-11e3-bf01-24c6515278c0	0.009096789	0.002												Liver
4ef20a13-f107-4654-adca-fc60b8f5be47	0.010438733	0												Biliary
4f1fc78e-733d-4c6e-86b2-dbe1f98c141d	0.099698872	0												Liver
4f3c2c94-fa7f-4945-9dff-e4d4dac95f56	0.00215021	0.006												CNS
4f6f48bc-c622-11e3-bf01-24c6515278c0	0.08211591	0												Liver
4fdc8980-c623-11e3-bf01-24c6515278c0	0.007724699	0												Liver
50203cff-83f8-4884-8346-b91ef717d00e	0.001958875	0.002												Kidney
5042b417-d14e-42bb-b6f3-de303346a252	0.002179589	0												Liver
50515723-b495-42a9-8750-e3da288bf6a3	0.000804635	0												Kidney
50a5970d-a0cb-4251-8ab0-74ad0e94be9a	0.002824774	0												Kidney
50b61288-1412-4104-92e6-8b1a359ef399	0.002806724	0												Liver
50e3a421-9741-4cd8-911b-0f47ca518b6a	0.005163194	0												Biliary
50eb58ba-c623-11e3-bf01-24c6515278c0	0.002082753	0												Liver
50f4d836-79a9-4bc7-a63a-7aa29e41d418	0.000459656	0.002												Lymphoid
513bafce-375c-49b0-ae75-6c607abd05d8	9.9e-05	0												Lymphoid
51800588-c622-11e3-bf01-24c6515278c0	0.041190805	0.018												Liver
51893d3f-e7f3-43f9-9fd0-c0f25ae96804	6.05e-05	0												Skin
518d6c1b-8234-40be-9560-6d383d5866fa	0.002136748	0.002												CNS
51dd1a39-7349-442c-b7e1-7850fb800569	0.00046734	0.004	cant_be_determined											CNS
51e5a835-eb48-4640-87d0-f40f5e2bff18	0.001925008	0												Kidney
524bbd14-1e1f-479b-9a71-d27fce32d8bc	0.001171314	0												Skin
52d8ccfc-c623-11e3-bf01-24c6515278c0	0.054069246	0.002												Liver
52f2d49e-f24d-41d2-9f73-33bd1cc51bba	0.11353936	0.01	cant_be_determined											CNS
532259b8-c622-11e3-bf01-24c6515278c0	0.925440426	0.09												Liver
534d941c-ec2d-47eb-b2dc-d3f856d0b151	1.88e-06	0	cant_be_determined											CNS
537cccf2-fb25-448b-813e-ca5d5642b910	5.11e-05	0	cant_be_determined											Lymphoid
53ac794d-1067-43e0-8dc0-43b131f43ec5	7.51e-07	0	cant_be_determined											CNS
53df19a8-c623-11e3-bf01-24c6515278c0	0.003069273	0												Liver
54354d24-c622-11e3-bf01-24c6515278c0	0.001328003	0.002												Liver
54cfd4b0-c623-11e3-bf01-24c6515278c0	0.00298762	0.06												Liver
558239c7-a160-4228-8fdf-a0a1d2f62133	0.004943834	0												Liver
55c75a2a-f3d2-4469-9d23-604cf539d548	0.007473977	0												CNS
55c82198-5be6-4cc5-b5b3-b707af234107	0.0003582	0												Lymphoid
55e520f4-0e4b-41a2-9951-c4e9f323100b	1.9e-06	0.002	cant_be_determined											Stomach
55e5497a-c623-11e3-bf01-24c6515278c0	0.03437903	0.002												Liver
561fd34c-7c7d-4df0-bbfc-3d31147ca562	0.000398957	0												Skin
569393c8-e2fe-4580-a45b-81f1b1e01135	0.005447473	0.002												Esophagus
56c846d6-c622-11e3-bf01-24c6515278c0	0.004942972	0.002												Liver
56cc8740-b132-4cbc-b513-f0b5b2305ca6	0.005043812	0												Biliary
56d4ea48-c623-11e3-bf01-24c6515278c0	0.122520757	0.004												Liver
56ddcb96-e90b-4fce-aa4c-c677bbfee488	0.00948051	0												Skin
56e57223-264e-489d-bc9a-a07789065c40	0.000593695	0.006												Lymphoid
5714b52d-7048-41b5-8141-bf42d960abe4	1.78e-05	0.002	cant_be_determined											CNS
571ce258-b453-4cac-b05e-05755791be84	0.000863406	0												CNS
573ee34b-43a7-40d8-95ee-0ced4b46a7c8	0.000837389	0.084												CNS
5769ae11-5f1b-483f-b228-7584591c66e6	0.070537444	0.002												Liver
578ba169-1d2f-4187-b174-082bbc6a5bd2	1.22e-05	0												Lymphoid
57947014-053e-4c34-b6a7-9e6f36f48010	1.6e-05	0	cant_be_determined											CNS
5808f774-c623-11e3-bf01-24c6515278c0	0.140346666	0												Liver
589daa3f-0b76-4c9c-b494-048955e36052	0.00014546	0												CNS
58d3e932-b4a3-4cac-a6ac-73160e354a15	0.015748785	0.014												Skin
58e2453c-bb58-43a3-9642-705ec0e0bdbd	4.04e-05	0.044												Myeloid
58f4ff52-c623-11e3-bf01-24c6515278c0	0.003887872	0												Liver
5912d4b3-2d5d-4b98-b967-1b4ff177097a	6.64e-05	0												Skin
59632e7e-c622-11e3-bf01-24c6515278c0	0.742352216	0.002												Liver
5975deb5-00d2-4d18-b5c0-34ac9947fe11	0.010140771	0												Biliary
59bfcb53-91c1-4dce-856a-f4afc8fa6224	3.22e-05	0												CNS
5a51a6fc-c623-11e3-bf01-24c6515278c0	2.87e-06	0												Biliary
5a5a8409-a8f2-4c7b-85e5-b8bd85f2930c	0.00341236	0												CNS
5b178f44-c622-11e3-bf01-24c6515278c0	0.037885071	0												Liver
5b4b2312-acb5-4329-8d46-7f93213e3daf	7.85e-05	0												Lymphoid
5bb37ffc-c623-11e3-bf01-24c6515278c0	0.002752195	0												Liver
5bcf473f-417d-47a5-9745-ac7faf830b1f	0.036448033	0												Lymphoid
5beafbbb-4613-4bab-977a-11c865e13a84	0.003557923	0												CNS
5c156f63-6537-4d93-a6c2-4155618cf638	0.001362365	0.008												Kidney
5c3def3a-b515-41f6-8157-681b963534e7	0.000282466	0												Skin
5c775f90-83d4-4c1e-88c2-4e1ed1daa96f	0.00862458	0.002	cant_be_determined											CNS
5c9b8a2c-c623-11e3-bf01-24c6515278c0	0.066514143	0												Biliary
5cbd429f-ffab-41ad-8016-422f1c922e99	0.000113599	0												CNS
5cf21488-c622-11e3-bf01-24c6515278c0	0.000294393	0												Liver
5dc6f055-c4f6-49a1-a68c-94cf87cbd363	0.009833301	0												Stomach
5dce221a-c623-11e3-bf01-24c6515278c0	0.030331762	0												Liver
5e9c69d2-c622-11e3-bf01-24c6515278c0	0.000885266	0												Liver
5eddfb26-c623-11e3-bf01-24c6515278c0	0.575327579	0												Liver
5ee1dda9-2e84-4617-af09-2ae02873b44d	0.008793264	0												Liver
5f00a760-fbc0-41f0-b92b-b3c553eac0e5	0.000197782	0												CNS
5f096d7b-a1ea-4cc2-af73-10108089ae84	0.001809213	0												CNS
5f18b334-6616-406f-8f33-0592b56c14e6	1.32e-05	0												Lymphoid
5f53bcda-2fd3-4574-9cc2-5efe353372b2	0.001981421	0												Lymphoid
5fa88c3a-dbc1-43f2-82b2-e0592f35ce57	0.004652561	0												CNS
5fd632ea-085e-4e9b-8dcc-ec94e492d3bf	0.001976719	0												Esophagus
5fe83740-0688-46fe-97b4-4c7c8cfa206e	2.67e-05	0	cant_be_determined											CNS
6012cb02-c623-11e3-bf01-24c6515278c0	0.001267414	0												Liver
603594e3-e427-494c-b9ee-e872d6629563	0.003573921	0.002												Kidney
60413de1-6cd2-4f74-8180-3bdd394d6d16	2.71e-05	0												Skin
60f81dba-c623-11e3-bf01-24c6515278c0	0.002684259	0												Biliary
616ff577-c5c3-432e-a857-f29901de119c	0.001265103	0.002												Lymphoid
6172ca02-c622-11e3-bf01-24c6515278c0	0.291462036	0.006												Liver
6239e340-d50c-45b1-a7ca-e1135671ae0f	0.098649473	0.66	cant_be_determined											CNS
626c9788-d70c-449b-b9dc-5e3f6fc00991	0.001295803	0												Lymphoid
627823ec-c623-11e3-bf01-24c6515278c0	0.050308955	0.004												Liver
62ac7c91-da99-4144-b927-e90528dcd8d4	4.51e-05	0	cant_be_determined											CNS
631eedb3-dbd1-4606-90e1-ea91b9a77a5a	6.45e-05	0												Lymphoid
637208b2-d8b6-45a3-a389-6f34db18fea4	0.000568238	0.032												CNS
63762458-902a-4329-a823-703b54cb5f9d	0.000440987	0.004												Skin
63f5bb12-1b20-49d4-9e98-570e368f947d	0.000319424	0	cant_be_determined											Stomach
63fef3fe-c622-11e3-bf01-24c6515278c0	0.095820179	0												Liver
64623aaa-a274-4baa-8b71-958d9c8df733	0.145889107	0												Esophagus
6495e68e-1434-45d3-a03d-f286447dda79	0.00292675	0												Esophagus
64b80154-c623-11e3-bf01-24c6515278c0	0.026472179	0												Liver
64e5ee38-e5c6-4911-ad87-c50dd8e52f1b	2.07e-06	0.084	cant_be_determined											CNS
650fe009-da01-4717-89df-9c95fafe3d7e	0.000211769	0.002												Lymphoid
6527aa5a-c622-11e3-bf01-24c6515278c0	0.00116556	0												Liver
6551ec26-4166-4d4f-bee2-444ea2466978	0.0050456	0.002												CNS
65be412d-46c3-4cbf-9b46-b35351e53065	0.573584209	0.036												Stomach
65f702b8-c623-11e3-bf01-24c6515278c0	3.66e-05	0	cant_be_determined											Liver
6622f932-c622-11e3-bf01-24c6515278c0	0.076843812	0												Liver
66b4a1f3-480f-4050-96ac-920c1c080864	0.000184181	0												Lymphoid
67189cd8-c623-11e3-bf01-24c6515278c0	0.001856621	0.006												Liver
674819dc-c622-11e3-bf01-24c6515278c0	0.062947689	0												Liver
675a5a32-b405-4f03-bfcd-756343d1dfaf	0.004746181	0												Kidney
67a2e34f-454e-4253-8f22-262fc74d312c	6.95e-07	0	cant_be_determined											CNS
68054218-c623-11e3-bf01-24c6515278c0	0.880168821	0.036												Liver
681e2301-2057-40e4-ab63-934775d63faa	7.61e-05	0.034												Skin
68509ede-3dcf-4a6e-9af0-4a9bb4dfa567	9.71e-05	0												Stomach
687baf0b-aed9-4ab2-adb6-556a1d177a24	7.17e-05	0												Lymphoid
68956108-2606-4696-b038-462b6c432398	0.000130064	0.006												CNS
69c3c88c-d51e-4e03-b96b-ec4f1a0faa2d	0.000464181	0												Esophagus
69d6142c-3a16-46c9-8bed-1f4edc267c4d	0.000288819	0	cant_be_determined											CNS
69f37546-c622-11e3-bf01-24c6515278c0	0.001801942	0												Liver
6a0d0c42-1884-4c6a-936a-678a822c0936	0.001179546	0												Esophagus
6a129b50-c623-11e3-bf01-24c6515278c0	0.047582087	0												Liver
6aba73ff-81e0-4f8d-ad12-e3136196e814	0.996303596	0	cant_be_determined											CNS
6bd4bca3-e568-4d1b-8b42-401fdf13d751	0.005121792	0.004												Kidney
6c306cbe-c623-11e3-bf01-24c6515278c0	0.001451142	0												Liver
6c642c0b-4dd0-406c-ac68-ea376802d61b	0.000214005	0												CNS
6cfce053-bfd6-4ca0-b74b-b2e4549e4f1f	1.73e-05	0												Lymphoid
6d2a5ee7-9e46-4c09-a982-7b61b5d9bdea	0.000101752	0												CNS
6d3551d6-b5f4-4fd1-b8d7-8e5931096c19	0.004290411	0.016												Kidney
6d3d5531-16b4-46ec-bd7e-394946855d62	0.001133643	0												CNS
6d9d7ffc-c622-11e3-bf01-24c6515278c0	0.002911271	0												Liver
6dbac113-d4cf-4db5-97c9-50fa400bb47e	0.001154889	0												Stomach
6e26f98e-c623-11e3-bf01-24c6515278c0	0.000961602	0												Liver
6e516c4b-fee7-4336-8470-494588e645b3	0.001069829	0	cant_be_determined											CNS
6ea6b5e4-cdc4-4e3a-bde2-8089d2a4d7eb	0.000139768	0												Lymphoid
6ec4456e-c622-11e3-bf01-24c6515278c0	0.003877667	0.008												Liver
6f395380-c623-11e3-bf01-24c6515278c0	0.218965212	0.346												Biliary
6f4d836f-e86f-4b12-9549-7117f59e3d4a	4.26e-06	0	cant_be_determined											CNS
7034e5f6-c623-11e3-bf01-24c6515278c0	0.022025063	0	cant_be_determined											Biliary
706a1085-5994-4d04-b56b-d301c9ed5afa	3.74e-05	0	cant_be_determined											CNS
708e21ac-f529-4461-bc4f-d3a194a92b80	0.024024027	0.006												Esophagus
70990332-7702-45e2-84cb-8bbff773f160	1.79e-05	0												CNS
70c2f91e-c622-11e3-bf01-24c6515278c0	0.005591352	0.002												Liver
7117854b-6f0a-4a43-b66c-506a3e29377d	0.006764242	0.186												Skin
712e5f3c-c623-11e3-bf01-24c6515278c0	0.139700371	0												Liver
718c5a31-6b19-4f68-9fb9-79b0c00d64a5	2.7e-06	0.002	cant_be_determined											CNS
71982a1b-52a4-440f-bd5d-62a0e6cc7fd9	4.13e-05	0												Lymphoid
72108583-5320-46ec-945f-5ff173d7dc15	0.000965986	0												Skin
7260f57c-c623-11e3-bf01-24c6515278c0	0.011246622	0												Liver
72a27124-24b9-41f7-a065-774fdf5f7d19	0.000604934	0												Kidney
72b62805-76f9-476a-b876-a781e69a2c90	6.91e-05	0												CNS
73afad06-c623-11e3-bf01-24c6515278c0	0.010215972	0.002												Liver
741c4656-0fd0-416e-86c8-f6533b6c96f4	0.00180826	0.098												Kidney
74e5905f-6350-498a-9454-9ea0593d2f56	7.61e-05	0												Skin
74ec279a-c622-11e3-bf01-24c6515278c0	0.001427958	0												Liver
7512b38c-c623-11e3-bf01-24c6515278c0	0.032673317	0												Biliary
759d30b2-ddb8-49e2-a604-57ff9222d3a0	7.37e-07	0	cant_be_determined											CNS
759e20be-6a2b-4c54-aca0-6d358598d6f5	2.38e-05	0.016												Kidney
75e1bdbc-474e-4367-9b4a-963b31f3b297	4.02e-06	0	cant_be_determined											CNS
760881cc-c623-11e3-bf01-24c6515278c0	3.12e-06	0	cant_be_determined											Biliary
7625877a-7a2b-466f-944b-9e56689ad47b	0.562696298	0												Head/neck
767517f2-f94c-44bb-9af6-36b662b166ef	9.16e-05	0												Lymphoid
76788f17-257d-47c7-ad85-ac5f959216b5	0.000113603	0												Lymphoid
76a0d9c9-5e69-44e8-9ed2-6d2e387803fc	0.004249795	0												Skin
77bf9514-88da-473b-9a91-f669ef3cd343	0.061791881	0.002												Liver
77c022d3-2f29-49d3-a1df-cc2e9407fd7f	0.007557392	0.002												Esophagus
78bc2608-c623-11e3-bf01-24c6515278c0	0.162271757	0												Biliary
78bc4dfa-c622-11e3-bf01-24c6515278c0	0.000641668	0												Liver
78bd2aa8-e5f6-4b4b-96f0-d406fbdbcee8	0.00016483	0												Lymphoid
796a8782-6d7e-47c8-b322-fcfe1dd240c8	0.018065791	0												Biliary
79b23f34-c623-11e3-bf01-24c6515278c0	0.00231686	0												Biliary
79e81ab3-5466-4324-9387-2de00d62315c	6.19e-06	0												Lymphoid
79fa8423-2014-4536-a1f9-cb48aed3c45f	0.001742511	0												Kidney
7a4f6014-f7a2-459b-bc43-df164e73cbba	0.000831488	0												Esophagus
7a6cb147-a576-446d-a605-fa846ea3d1ad	0.034692535	0												Liver
7ac3e543-3bc2-4a59-84fc-b5aa0def592c	0.000220687	0	cant_be_determined											CNS
7adcea71-1aed-450c-b0ff-b9d9820c6153	0.005726279	0												Esophagus
7ae510f8-c622-11e3-bf01-24c6515278c0	0.001188923	0												Liver
7b296706-b535-45a0-9a8e-4a34a8c33bb5	0.000152583	0												Lymphoid
7b482f46-adcc-48ae-a4d6-17f4edd998dc	1.21e-05	0												Stomach
7ba70717-d65e-4a45-af79-60a976770526	0.000403745	0.002												Skin
7bd3d112-d411-4ea8-a9a9-bd965f0fc943	0.002475422	0												Kidney
7bdcb78a-c623-11e3-bf01-24c6515278c0	0.037754969	0.026												Biliary
7c405ca0-c622-11e3-bf01-24c6515278c0	0.043130285	0												Liver
7c5c2293-3f40-4ae3-8346-6a327b2abf4d	0.000167311	0												Esophagus
7cd7fe38-c623-11e3-bf01-24c6515278c0	0.500494078	0.04												Liver
7d2da7ba-f57c-4083-9572-6fa98008083b	0.006415269	0												Esophagus
7d38018a-c622-11e3-bf01-24c6515278c0	0.156557486	0.002												Liver
7d52a9e7-b5a9-4519-96fd-e8be42a7890c	0.000383302	0												Lymphoid
7dddd413-d2c6-4f75-bbf6-3b202877546e	6.95e-07	0	cant_be_determined											CNS
7df3a542-c623-11e3-bf01-24c6515278c0	0.245201612	0												Liver
7e036d40-b669-4929-a1e2-c4736e01a473	0.077475448	0												Stomach
7e22401d-f4cd-44c5-8a01-b08a439e5a31	0.001468085	0.002												Skin
7eac4710-c622-11e3-bf01-24c6515278c0	0.002800896	0												Liver
7eb0ee38-fbe2-49ea-ba63-aa13825eca6e	0.341082347	0.002												Liver
7eb0f792-858f-45d1-a908-125b02ea1506	0.002253003	0.002												Stomach
7edc42d3-d08e-4360-a3e1-aeb57cfc6640	0.026426291	0												Skin
7f031d71-3cb7-4744-86bd-a3beecfe166e	0.000275133	0												Skin
7f22b0f7-4040-4c84-939e-894c3050ef5d	0.00022037	0												CNS
7f795952-c623-11e3-bf01-24c6515278c0	0.009437462	0.002												Liver
7f7e007e-4b06-4328-b116-6dcdb2ad8181	0.000726842	0												Lymphoid
7f9382a5-f6da-4fe8-93ad-6adc91f508fa	7.73e-07	0	cant_be_determined											CNS
7f94d650-41b9-4664-bcde-dc8533e4602d	0.000199603	0												Esophagus
7fba5aac-c622-11e3-bf01-24c6515278c0	0.001456514	0.018												Liver
80ab6c08-c622-11e3-bf01-24c6515278c0	0.01018898	0.022												Liver
80ebcecc-4a7a-40dd-914c-f0648a58095f	0.072016996	0												Liver
819b4304-c622-11e3-bf01-24c6515278c0	6.8e-05	0												Liver
81b4dd02-34ec-4ddc-8818-ed888a60ad88	4.72e-05	0												Lymphoid
81c7a8c1-8a6a-4e78-a72c-f7c021c67ff7	0.000888854	0.03												Stomach
81cc0f39-6677-4f2e-9a75-d30152b188f3	0.002878834	0												Lymphoid
82aefe8e-c622-11e3-bf01-24c6515278c0	0.004150278	0.014												Liver
83d57c5c-c622-11e3-bf01-24c6515278c0	0.003176909	0												Liver
8404ef5b-7a64-47fe-98f9-3f63619d2d99	0.000828344	0												CNS
850389d4-c622-11e3-bf01-24c6515278c0	0.001346823	0												Liver
85422a8e-2599-4dab-a257-150e380ecba8	0.000569136	0												Kidney
858631eb-4e91-4aad-809c-c3948519313d	0.100245497	0.01												Lymphoid
8659a35e-c622-11e3-bf01-24c6515278c0	0.039273641	0												Liver
866ecfe7-caa6-4565-9418-6b9d6c8a3b43	0.000319348	0												Lymphoid
868c95ad-45df-4f8e-9553-b7c2c5679deb	0.032112845	0.024												CNS
86cbb7ad-b22b-414f-a122-77d38c77207d	2.64e-06	0	cant_be_determined											CNS
870e7aa5-a9c2-4c4e-afa8-36bb3bdc4eee	0.000328235	0												Lymphoid
873ed251-fa44-465f-99e0-c90a42ea13d9	1.78e-05	0												Lymphoid
87671312-c622-11e3-bf01-24c6515278c0	0.612495559	0.004												Liver
87e0b332-60f3-4d59-8c4e-691a820c9ee1	0.001147037	0.004												Kidney
880e6970-0131-4966-b13e-8614d33f0df7	0.002200733	0.04												CNS
8867bdef-3a8d-433e-b10f-d752e2cbb022	0.003042233	0												Stomach
889fb525-5055-4408-a12e-17f1225c9d29	0.044566497	0.004												CNS
88d82a42-c622-11e3-bf01-24c6515278c0	0.10560867	0												Liver
890e840c-1d1d-4874-a8eb-f9d9a2b50a1c	0.006675701	0.002												Lymphoid
897ba508-d74b-46bf-8554-1210a66a36d1	0.001750056	0												Skin
89f34810-19c6-47bc-981d-98498b013686	0.000428507	0.248	cant_be_determined											CNS
8a2580c3-9c89-4cb0-b94d-3eca15dac1c3	0.078983856	0.002												Liver
8a6d6b2e-c622-11e3-bf01-24c6515278c0	0.000837137	0												Liver
8a8dd718-c46e-462a-9793-83d88f5caa7f	0.000362766	0												CNS
8b0c4c91-2d07-4a9b-97a1-d2bda003437e	0.017068376	0												Liver
8bda75a6-86b9-458e-948b-05049b4c52ce	9.48e-05	0.022												CNS
8c4038b6-c02a-46db-9514-c13b88d9bf48	3.31e-05	0.002												Lymphoid
8c5f9574-c622-11e3-bf01-24c6515278c0	0.000277799	0.02												Liver
8ca665f8-fe78-48bf-8c0f-c606d92885d4	0.00494542	0.008												Skin
8cce153d-953d-40c5-976b-60f6a143608c	3.29e-05	0.026												Lymphoid
8ce95cae-6adb-4bac-b072-94e2d9b70017	7.84e-07	0	cant_be_determined											CNS
8cf713ff-256b-4411-a1b4-5bf6f445b747	0.000268131	0.002												Liver
8d7592e2-c622-11e3-bf01-24c6515278c0	0.000645299	0												Liver
8ddcf0d9-312f-4055-8984-55d463face34	8.18e-05	0												Lymphoid
8e48aa43-6cd1-4aef-83ce-2451b1b86e8e	0.001891333	0												Esophagus
8eb90ea4-c622-11e3-bf01-24c6515278c0	0.000567193	0												Liver
8efb116f-4ecf-4191-8ebf-90a94c1880cf	0.000216101	0.074												CNS
8fa0484b-5f95-4ec8-b3de-cea2e8f3c5ca	0.002284023	0.002												Kidney
8fa7549d-d0a6-4216-9763-74b0f21c0fd7	0.000165503	0.04	cant_be_determined											CNS
8fa9575b-b2c9-4bd7-8da1-3c2cdf0e39f6	0.00045464	0												Lymphoid
8fc11cb6-9d79-41c3-bb45-0dadda890e8d	4.19e-05	0												Lymphoid
8fc7a4cc-c25d-4372-bf17-2dae795e5596	0.001372403	0												Kidney
8fd5e62c-c622-11e3-bf01-24c6515278c0	0.00039488	0												Liver
8ff9b1b6-a498-47fe-a970-ab7cfb64e653	0.002528498	0												Esophagus
906f6f1e-569d-4ce2-9273-1f305782f77f	0.002100005	0												CNS
909f3c5d-89fc-419b-a654-75ac1dbb149f	8.6e-06	0	cant_be_determined											CNS
90ab64be-2229-4a8e-b864-4260b6cb39e9	0.00058259	0												CNS
90de4296-0223-4b9f-8abb-6db278bfc932	3.45e-05	0												Lymphoid
91397d9c-3120-407f-8847-74b356943469	0.000382017	0												Lymphoid
915cbb43-9e00-433d-818f-531011bea57e	2.4e-05	0												Lymphoid
917564e4-c622-11e3-bf01-24c6515278c0	0.010954945	0												Liver
924613ef-8732-4703-a387-136d37b2ba6b	0.000265186	0	cant_be_determined											CNS
9258860c-a336-4075-996d-2ee0c18b281c	0.000968239	0												Esophagus
926a04de-ef57-4271-91db-e90de8aa8a1a	0.007331729	0												Esophagus
929f2216-6ab3-414f-a814-49b69d4b49d9	0.004229172	0												Lymphoid
9321341c-c622-11e3-bf01-24c6515278c0	0.031389958	0												Liver
93a49462-4bd3-4efa-87a5-69006abba5a0	0.113810874	0												Liver
93be2990-bceb-45fd-aca5-3358d96e9d5a	0.095459397	0												CNS
94431626-c622-11e3-bf01-24c6515278c0	0.015053553	0												Liver
94cf1801-a720-4b2f-aab5-0b76c8ccb242	0.00062503	0	cant_be_determined											CNS
955763f0-0735-418f-9ea4-3c980a966002	0.000143584	0	cant_be_determined											CNS
9563a264-c622-11e3-bf01-24c6515278c0	0.009747292	0												Liver
959efb81-1d56-4659-9b7a-09f2b62483f2	0.000268571	0												Kidney
9650640f-154d-4696-aa96-3611c6fcee7b	0.100963821	0												Head/neck
96a2896c-1e32-4827-a526-6b7104832f9a	0.000242312	0												Esophagus
96abdbc8-c622-11e3-bf01-24c6515278c0	0.00177519	0.002												Liver
96e62134-b8cc-4931-9c99-1193448c7c93	1.66e-05	0												CNS
9749a9a5-cb7f-4038-a5f9-5e2d6b97c689	0.002414806	0												Esophagus
97a6f44a-c622-11e3-bf01-24c6515278c0	0.001060067	0.036												Biliary
97f451e5-a1cc-4f29-8318-0e6ae74efe2f	0.000149213	0												CNS
983c14b8-f35b-497b-9fd4-5e5f5f0a7aa7	0.002935915	0												Biliary
98d27916-c622-11e3-bf01-24c6515278c0	0.059451587	0.002												Liver
98e8f23c-5970-4fce-9551-4b11a772fe1b	0.000360752	0												Skin
995a1ad2-faca-4a37-a59d-e62455985afb	0.000456351	0												Lymphoid
99bdc3da-c622-11e3-bf01-24c6515278c0	0.384001604	0												Liver
99e7016a-c3c1-431c-8838-beb78a3cc017	0.000273809	0												Lymphoid
9a015939-8810-4808-9dfa-fb60a1173bc7	0.001999058	0.002												Kidney
9aac83e4-c622-11e3-bf01-24c6515278c0	0.035727196	0.002												Liver
9ae33a63-6b1a-43bf-9205-463c867bcbc4	0.000484377	0												Esophagus
9b3e7a03-cf8c-4da8-bc36-20129d7783ba	0.014879342	0												Lymphoid
9ba2c970-c622-11e3-bf01-24c6515278c0	0.019142246	0												Liver
9ba6be6d-2032-444b-ab3c-dbee8023759d	0.003232836	0												Esophagus
9bb9164e-ea1b-49ab-bbcc-f59cf8c32345	0.131420757	0												Esophagus
9be1246b-3dc1-4928-8b89-2d5ed0c866e8	3.73e-05	0												CNS
9beb4126-0112-4c06-80a3-e5dd1c2b88d5	0.023473219	0												CNS
9c00828e-e9ae-4b9c-959e-34837ee2b230	0.003147195	0												Esophagus
9c730cfb-3fd6-428a-a0a4-c061ca5db06c	7.65e-05	0												Lymphoid
9c949c63-aa63-4a84-ac5a-b5260775cee6	2.23e-06	0	cant_be_determined											CNS
9cb80280-c622-11e3-bf01-24c6515278c0	0.003432353	0												Liver
9db994a0-c622-11e3-bf01-24c6515278c0	0.001085175	0												Liver
9e0009d1-c993-4247-9706-88ee84591dec	0.003650722	0.006												Skin
9e842227-2bc6-4185-bedb-abeb03836b51	2.35e-05	0.002												Lymphoid
9e99b8d9-6f0d-4fe0-9c1e-d286c0714909	2.31e-06	0												Lymphoid
9ec31146-c622-11e3-bf01-24c6515278c0	0.000530066	0												Liver
9f298806-77b6-4c76-bd38-3343e1a3c6f0	9.02e-06	0.002												Myeloid
9fb6b7be-0084-48f7-a256-6d170e72e97f	0.000693239	0												Head/neck
9fba5db6-c622-11e3-bf01-24c6515278c0	0.023290678	0.002												Liver
9fc5b5c7-3973-42b4-8710-454de0cb5b50	7.1e-06	0.002	cant_be_determined											Skin
a08c196e-4f96-4b16-94b4-aa6a0153ac50	0.000113772	0												Esophagus
a0eb2611-1ca6-44b7-897e-ce18399eb7bc	0.001164773	0.034												Kidney
a13ee768-1423-4fcc-b663-caaf6694acb3	0.002287888	0.04	cant_be_determined											CNS
a1724132-f95c-4622-8987-fe3183b9dce3	0.00097167	0.004												Lymphoid
a1a75f66-c622-11e3-bf01-24c6515278c0	0.838563917	0.004												Liver
a1e3dc5b-b81f-4890-870c-ed3b8ac36dec	0.015223282	0												Esophagus
a2034620-e4b5-4d4f-ac05-7fc1c098eb40	0.001815052	0.012												Kidney
a284fe9d-9afd-4472-8d70-243ca9be5c2c	0.000378103	0												Esophagus
a2a4021e-1273-4c18-907c-d20454ab898c	2e-06	0	cant_be_determined											CNS
a2a67c8a-c622-11e3-bf01-24c6515278c0	0.015797404	0												Liver
a31b6123-c1b7-4cd0-86d8-b2e640cce9da	0.000883792	0												Lymphoid
a335b03d-41ac-4d41-a2a9-3134b5b0a0a7	0.000986908	0												Kidney
a37a825c-d74e-46cc-92ef-b65016857b4a	0.000540478	0												Esophagus
a3914a6c-c622-11e3-bf01-24c6515278c0	0.31553598	0												Liver
a46f1e20-9e97-4dcc-a5ed-532aad9f3236	0.992298576	0.67	cant_be_determined											Stomach
a47c2012-c13d-48ac-88b6-e09bfd50122b	0.003100136	0												Biliary
a4ca18dc-c622-11e3-bf01-24c6515278c0	0.024371007	0												Liver
a612b654-c622-11e3-bf01-24c6515278c0	0.177104821	0												Liver
a65bcd07-c47d-4bda-a2bf-21f68cef2f3b	1.29e-06	0												CNS
a68389d4-431f-4582-b4df-e8ad200aa3be	2.83e-05	0												Myeloid
a6e24c2a-26b9-409c-bbcd-a8fcdd1e437c	0.006270509	0.102												Skin
a7314730-c622-11e3-bf01-24c6515278c0	0.002079518	0												Liver
a742a46d-2594-4efe-a701-4a2737ffae81	0.000635315	0.062	cant_be_determined											CNS
a7e1deb7-2e3d-4e36-90c7-9cae34cdcfb3	8.03e-05	0												Lymphoid
a7fb0931-28df-46f4-bc0f-2011fc91f0e1	0.000298619	0.002	cant_be_determined											CNS
a83e247a-8f65-4be4-9c6e-a72c4abffae8	2.03e-05	0.002												Lymphoid
a846f5e8-c622-11e3-bf01-24c6515278c0	0.029806559	0												Liver
a84915de-6562-4836-86f9-f2a05598296e	0.000828927	0												Skin
a89a2341-263d-4e7f-87fa-18d9692d6b2b	0.002243904	0.002												Kidney
a92023de-5c97-4bf2-aa3c-0e768d7c5ece	8.45e-06	0.004												Esophagus
a94d63fa-c622-11e3-bf01-24c6515278c0	0.108452184	0												Liver
a9a240f3-d237-4bb8-b968-e4a3cc7c2633	0.003145613	0												Lymphoid
a9d055c6-6c53-4e85-8270-34883a1342a9	0.000391614	0												Lymphoid
aa018d90-5250-4313-9f7c-a3f196765e07	0.000234863	0.06												CNS
aa20b9ab-dba9-4002-ad45-cafa2f85cef7	1.24e-05	0												Lymphoid
aa2654f4-94f9-487a-b415-85df69261161	0.987799407	0.652	cant_be_determined											CNS
aa4bf69c-a1a6-48dc-96fc-3fe7d2680517	9.63e-05	0												CNS
aa5907cb-3be3-4e23-982d-719417baeb37	0.000160761	0.052	cant_be_determined											CNS
aabddb20-c622-11e3-bf01-24c6515278c0	0.003762761	0												Liver
abbbe65c-c622-11e3-bf01-24c6515278c0	0.080484823	0.002												Liver
abe290ed-67c8-42bb-84f7-0d32a5f8f3db	0.002576898	0												Esophagus
abedd46c-47b8-4242-adb6-12835400cb3f	0.000145626	0												Lymphoid
ac1bd179-8285-468c-ab9f-7f91151ca0f2	0.000130282	0												CNS
ac23a8d2-ac42-4031-9dd4-9b56baeb246e	5.72e-06	0												Lymphoid
ac2c8928-33a2-4aa0-8bc1-cdfa1ca0b56a	7.04e-05	0												Lymphoid
aca4d810-9540-4ce3-8ceb-72d396c9b704	0.000830783	0.006												CNS
ad0700e2-048a-4856-a77a-bc0b6f25f0e2	1.64e-05	0												Lymphoid
ad4aa4dc-bea4-4f4a-8b1b-8f361112f84f	0.001926547	0												Esophagus
ad92f17f-11e6-49bd-9835-6b2f47053485	0.000282094	0												Lymphoid
adfbba82-c622-11e3-bf01-24c6515278c0	0.004490907	0												Liver
ae464652-2f8c-4d94-8b08-cd8f1d29256e	0.000820172	0												CNS
aed4363b-19b8-4cb5-aa34-a442410d0796	0.002760551	0.006												CNS
aeeb01b4-790e-4929-bd59-6aad837603b1	4.25e-06	0												Lymphoid
af2cbdb6-c622-11e3-bf01-24c6515278c0	3.27e-05	0												Liver
afd1f2e0-343c-416d-8e8f-2177f312c2f0	1.42e-06	0	cant_be_determined											CNS
aff5793b-3197-4d1d-bf0a-9b0ded5f2937	7.53e-05	0												Myeloid
b02b4bba-6e66-44fb-a48f-38c309aaaac5	0.000594586	0												Esophagus
b061cb06-e927-4f24-82bb-9e651f7ae0e3	0.000149282	0.028												CNS
b070af2a-c622-11e3-bf01-24c6515278c0	0.059625356	0												Liver
b0d1fde4-928f-4f4c-bff6-33b885582bb5	0.000540118	0												CNS
b16780b0-75ba-4304-87e0-33f1e321b622	0.001015088	0.032												CNS
b1d2457d-3267-46ba-9fdf-663985e60538	8.88e-05	0	cant_be_determined											CNS
b1f19de6-c622-11e3-bf01-24c6515278c0	0.068995885	0												Liver
b2190e26-1809-4aba-9f45-07c2edb3b4a4	0.000312417	0												Lymphoid
b28f7607-f162-425f-b44d-64e9633c8824	0.000848906	0.008												Kidney
b2d9aaff-5a48-48f0-bf55-bfd4ddaeccaf	0.133475702	0												Liver
b30dfb8b-8288-4e5a-afc2-3d5bd7bfa26c	0.00165571	0												Kidney
b32449c0-c622-11e3-bf01-24c6515278c0	0.048665155	0												Liver
b330c50b-c45f-413d-918f-33275d0d8f91	4.74e-06	0.024												Lymphoid
b35d9a68-29f4-49ab-b83e-b5151679e3af	0.023496243	0												Skin
b3befa40-8f44-4eb6-ada0-ec395f460656	0.005438439	0												Skin
b421b9ca-c622-11e3-bf01-24c6515278c0	0.366308874	0												Liver
b42d183c-bc9c-4652-9e56-10c54c5ee96e	0.000224694	0												Skin
b49d5310-3cc5-4386-9444-cf0d61b52376	0.002515323	0												Stomach
b53dcb4d-f894-47b8-8a4e-17c7998d8120	0.003234742	0												Esophagus
b55751c4-c622-11e3-bf01-24c6515278c0	0.001659264	0												Liver
b5f90cb8-7304-48fb-a1d3-ff459c7d79d1	8.69e-06	0												Liver
b61f7f76-f365-4071-a28d-bf354d5a670d	1.84e-05	0	cant_be_determined											CNS
b64173fc-abac-4695-902b-f0acf9444e9f	0.000318467	0												CNS
b67208c4-c622-11e3-bf01-24c6515278c0	0.001656047	0												Liver
b68f18e1-0117-420c-9405-e8d3a1e8caff	0.00061301	0												CNS
b757a040-3c9e-45e7-a045-9cd08db11d62	0.015983163	0												Esophagus
b77543e4-c622-11e3-bf01-24c6515278c0	0.057991393	0												Liver
b7fbd99c-dea0-4448-a430-7f94c611e702	0.002320373	0												Kidney
b86655a4-c622-11e3-bf01-24c6515278c0	0.102560973	0												Liver
b86678f3-c9cf-4ba4-8248-3efb2a7c4884	0.002878551	0												CNS
b8f3137e-5e92-4a56-90d4-884a4ed2ef9c	0.002170986	0												Esophagus
b994762c-c622-11e3-bf01-24c6515278c0	0.080180874	0.002												Liver
b9bcba3a-c9be-4305-b5f4-c861282921e0	0.013441308	0.004												Esophagus
b9d2e29e-8546-4310-aeea-e029f17c0516	0.00236909	0												Kidney
b9dbc78e-44ce-427c-bbeb-de8d097bde2c	0.00018009	0												Lymphoid
ba096d4f-5a6c-4c31-ae03-e7483cf58c38	0.000835902	0												Esophagus
ba5667da-7688-4931-bdb7-d65f391caf60	3.35e-05	0												CNS
ba67c02a-180b-43f3-b53c-2b77d84fbe3c	0.000909006	0.086												Kidney
ba940092-c622-11e3-bf01-24c6515278c0	0.149122429	0.02												Liver
baa02e74-9cae-4996-858e-17d9f52d924b	0.000513209	0												Lymphoid
bb45c6f5-49cb-418d-85bb-3ded165e2d07	2.34e-05	0	cant_be_determined											CNS
bb567851-d4ff-4a93-8576-04a37aea68af	0.00071325	0.002												Kidney
bb5bedd3-d8fc-4739-8e6b-9e37223f8be2	0.005761083	0												Esophagus
bb659e7c-0b97-41b5-ac10-a66bb1f6f283	0.003581018	0.004												Kidney
bb65d670-0411-4fc5-a6cb-019caec1ab36	0.000275473	0												Biliary
bb66787e-e0b2-45b6-b452-98a6c32132e7	0.00162851	0	cant_be_determined											CNS
bb91765e-4c55-4e7d-93e8-77face8c91f4	7.59e-07	0	cant_be_determined											CNS
bba106ce-c622-11e3-bf01-24c6515278c0	0.021254613	0												Liver
bc0dee07-de20-44d6-be65-05af7e63ac96	0.023465802	0												Stomach
bc5160ae-d629-46c4-b068-7075876b9103	4.81e-05	0	cant_be_determined											CNS
bc69c97c-65c1-4e1c-a241-d17d3130e024	0.007992862	0.014	cant_be_determined											CNS
bcc74a5e-c622-11e3-bf01-24c6515278c0	0.006173133	0.004												Biliary
bcc819eb-f4d8-4ddc-9fdc-a6307fb6741b	0.026622415	0.014												Head/neck
bcd52bcb-6e35-4220-9775-96dabff926b4	1.03e-05	0												Lymphoid
bcefbf6a-80ff-4825-9d3a-492e2dceb35d	0.000810976	0.002												Skin
bcf76f1a-7109-422d-94c9-5e8364895fa0	0.000218662	0												Skin
bd1ce02b-bfaf-4cde-aaac-06097a12e248	0.00049593	0	cant_be_determined											CNS
bd2f8133-3e71-4c5e-998f-0c1a9fdfb75f	0.033984886	0												Stomach
bd6bd940-ef06-433a-80d9-dca5683e9cd2	3.03e-05	0												Lymphoid
bdbcffb0-c7da-4e7d-8002-9feffe48533c	0.00020844	0.002												Lymphoid
bdc039d6-4817-4e6f-b8c6-a40b1e8e1a06	4.38e-05	0												CNS
bdeeb1a6-c622-11e3-bf01-24c6515278c0	0.003754195	0												Liver
bea0e802-96d3-46e2-8030-17019a71e0bb	0.959321929	0.64	cant_be_determined											CNS
bef21282-c622-11e3-bf01-24c6515278c0	0.227793502	0												Liver
bf24366f-fd91-4d84-8b3d-eed80064250d	0.000225544	0												CNS
c00d925a-ca4d-4561-a8f2-d4542f218086	9.73e-05	0												Lymphoid
c021b61c-c622-11e3-bf01-24c6515278c0	0.011783356	0.004												Liver
c13d7ee5-2bf0-43e4-9cd3-9326ed9355cf	0.000672971	0												Lymphoid
c158ac2a-c622-11e3-bf01-24c6515278c0	0.004734772	0.032	cant_be_determined											Liver
c19a1388-95e6-4708-a24c-3738f1908071	0.004079415	0.042												Kidney
c20cb5c8-a6d0-4150-b72b-3f7e8909d72b	7.95e-05	0	cant_be_determined											CNS
c271b7d2-c622-11e3-bf01-24c6515278c0	0.004511848	0												Liver
c298ec82-8305-4c89-898f-268308f782b2	0.001466953	0.022												Kidney
c2aafb9c-230a-43df-9a43-b34aa145a7bd	0.00612408	0.006												Kidney
c459dba5-b27c-46f0-b5b8-c62d597a0542	0.000762193	0												Lymphoid
c488a170-c622-11e3-bf01-24c6515278c0	0.002196498	0												Liver
c4e048de-1d43-4fbd-8289-9279b16c8a3a	1e-06	0	cant_be_determined											Stomach
c569b867-dadd-4591-af17-7e9b74699561	0.000398997	0												Lymphoid
c59188a8-c6bb-433c-97fe-69f79a126d03	5.35e-05	0												CNS
c5ad7238-c622-11e3-bf01-24c6515278c0	0.032672335	0												Liver
c5bc0826-8037-4fe6-ad4e-b1b675e771fb	0.000505932	0.012												Kidney
c6224ab0-74f5-4f0a-9fe0-c083f806c853	0.000292759	0												CNS
c642b9cc-bdb1-4796-9692-8be92398be17	0.000306913	0												Lymphoid
c66926a8-474d-482c-bfb7-043029c8b737	0.005277978	0												Lymphoid
c6bb32f0-c622-11e3-bf01-24c6515278c0	1.22e-05	0	cant_be_determined											Liver
c7d798b8-c622-11e3-bf01-24c6515278c0	0.011141262	0												Liver
c8f61136-0bea-4fb4-bb63-699af7f22146	0.012932418	0.568	cant_be_determined											CNS
c8f64a71-e545-4eb6-9da3-2d43ae0c2627	0.006996494	0.058												Kidney
c906a13e-c622-11e3-bf01-24c6515278c0	0.023116065	0												Liver
c955387a-16e5-447c-8e69-e4c04a9861d5	4.03e-05	0												CNS
c95a2b1b-726c-4608-9fff-d57b6f1aa75a	0.000172234	0												Skin
c971ffa7-ce37-4138-b028-598a30478e25	0.002635325	0												Esophagus
c9ad6b1c-baa0-45a7-b7c4-733728505b8a	0.002963222	0.012												Kidney
c9ca979d-b3ad-4ff0-92d0-140105413d28	7.78e-07	0	cant_be_determined											CNS
c9f87f0d-4967-4be2-8b92-a20f1980ea22	0.000281075	0												Lymphoid
c9f91ded-3b04-4cd1-8ea6-bbc635a8a4f0	0.002903921	0.004												Esophagus
ca004926-f3ac-4824-8ed5-d84e62efdfae	0.002003459	0												Skin
ca137611-533a-4d20-a85d-8e4c3a1eab2d	0.017669851	0.002												Head/neck
ca49fdb1-d55a-427c-9819-90980dcd956f	0.000285634	0.002												Lymphoid
ca5ded1c-c622-11e3-bf01-24c6515278c0	0.000417523	0												Liver
ca8fa9f5-3190-440d-9879-22e33d05ca6c	0.000179319	0												Skin
cb381d49-4546-400c-af02-f877083caa0a	0.002598816	0.004												Esophagus
cb56e4c2-2fff-4f09-be34-fbdaa3794b35	0.000943048	0.002												CNS
cb74d12c-eed1-4b14-8f93-d70e625eb65e	0.000969909	0.03	cant_be_determined											CNS
cb753e6f-5ea3-4b58-9db3-7a62d15c8b2e	0.004528725	0												Esophagus
cb86fbb6-c622-11e3-bf01-24c6515278c0	0.006524661	0.002												Liver
cb89cea8-f78e-4024-97c2-8f24debee1bc	0.000204857	0												CNS
cbb788dd-964b-4cfd-80e1-979c7b5b3c52	0.003851941	0.018												Kidney
cc39b534-5ba1-4ea0-956b-676f6732beec	0.000165519	0												CNS
cc69fe94-0ecf-45ad-a03f-8fb7198e8657	0.003918806	0.062												CNS
cc6ab103-f07c-4b80-8c8e-cddc8a4da02e	4.73e-05	0	cant_be_determined											CNS
cc792058-c622-11e3-bf01-24c6515278c0	0.000749346	0												Liver
cc7bba1d-8990-4557-a565-9cff1085f023	9.14e-06	0												Lymphoid
cd2a045b-fbde-49c6-8be6-c0e3ecee246f	0.001146881	0.002												CNS
cdc2c513-590f-444b-9347-32ba365313a7	0.00029646	0.026	cant_be_determined											CNS
cdc672cc-35df-4f10-88f1-d3e40dabf601	0.001298317	0.002												CNS
cdcc04fc-c622-11e3-bf01-24c6515278c0	0.004749462	0												Liver
cdf045a6-ab6a-4dc5-b0b0-d72fbb26b0bb	0.000319527	0												Kidney
ce6154e9-3f3a-442f-a608-35e1bab66927	0.000229652	0												CNS
ce799e7b-30e7-44a5-a185-3e50d5e059ef	0.031446747	0												Esophagus
ce85ccf3-6621-4976-b187-2f28d45dd4d9	0.016346076	0												Lymphoid
cf777ef1-765f-4828-b789-f5aa6722eb35	0.070994439	0												Liver
d00625b4-6e0e-4d96-8e4c-8f1ddcc7aded	2.99e-06	0	cant_be_determined											CNS
d0161ca7-3c33-4fe5-80df-0cc4b3c4e8ee	0.000441398	0												CNS
d0469256-c622-11e3-bf01-24c6515278c0	0.053278372	0.004												Liver
d17c2123-d262-43f4-9d06-3547f991cde7	0.000166402	0												CNS
d182b67c-c622-11e3-bf01-24c6515278c0	0.01869995	0												Liver
d1842491-29ff-4801-8c8a-4d619f749dd1	0.001916018	0												Esophagus
d1be624b-eb76-4ce3-a6ba-ffc5b23953d3	0.000167799	0												Lymphoid
d1d2932b-f1c4-4080-9b75-dcf1ab0ab217	0.005175458	0	cant_be_determined											CNS
d2620dab-4319-499a-b8f1-9575aaf8f4f3	0.000576949	0												Skin
d2ab7fd4-d1c7-48ae-ba9a-78c5d811465e	0.002668514	0												Kidney
d2b7bb0a-c622-11e3-bf01-24c6515278c0	0.000646572	0.014												Liver
d31cce9d-1b38-44fd-9378-0d128e12a011	8.46e-05	0												Lymphoid
d3ad5b5a-c622-11e3-bf01-24c6515278c0	0.050217855	0												Liver
d3b72600-a888-4ef6-ac5d-661c105405dd	0.000369473	0												Liver
d4c6061b-5019-4564-806d-4e75910a4690	0.001787061	0.05												Kidney
d4c9e5c6-c622-11e3-bf01-24c6515278c0	0.041951305	0												Liver
d4ea36e2-1323-4441-8c63-40ce269608f4	0.000197703	0	cant_be_determined											CNS
d4ecbf52-f6a9-4394-9d3b-8eb8eee1b17b	6.95e-07	0	cant_be_determined											CNS
d5423a93-0a72-43cf-a7ae-9011f47553c7	0.001555433	0												Lymphoid
d5c87d16-172f-4790-8867-949dcaa534d4	0.003553596	0.004												Kidney
d5f92ce6-796f-480d-bf98-e1080a279207	0.0006954	0.082												CNS
d609ce92-9edd-4286-bd5f-b93304cae9a2	4.11e-05	0.04												CNS
d60f880a-c622-11e3-bf01-24c6515278c0	0.257840702	0.002												Liver
d6ee68e5-ceb3-4a63-b3bd-e64fe5398102	4.26e-05	0												Lymphoid
d733cf1a-4c42-4def-b6cb-5ef2c6a27fcd	0.000259882	0												Lymphoid
d7578910-c622-11e3-bf01-24c6515278c0	0.045993052	0.02												Liver
d7f8e1f3-a9a7-4929-92df-1283bac815d2	0.004078291	0												Stomach
d876d576-c622-11e3-bf01-24c6515278c0	0.008748751	0												Biliary
d88296ac-bb0d-47ab-9051-6c358f0af780	4.85e-05	0.004												Lymphoid
d884d070-6077-4155-9978-76aca7ba1e76	7.77e-07	0.002	cant_be_determined											CNS
d8995dfa-a780-4fe6-b3f8-fb464f51a1cf	0.004597055	0												CNS
d8e2af63-afe0-4f15-88b4-78118cf68160	7.18e-06	0	cant_be_determined											CNS
d91e1a92-837d-44d6-92d8-419f435effe0	0.000773447	0	cant_be_determined											Stomach
d926a39f-d057-4e78-8907-b74f52157d99	0.002602951	0												Kidney
d9338d73-1d5e-4808-91f2-b5a09f7342de	1.55e-05	0.002												CNS
da10f77f-4414-4125-b359-de596421cca6	0.000174603	0	cant_be_determined											CNS
da910f22-126e-41dc-be6b-47c8f69ad106	0.000917117	0												Esophagus
dabdd983-a819-410e-bfb8-5c66a66cf5ab	0.000141024	0												Lymphoid
db4d1d04-1189-4c0e-99a7-904667af07b5	0.000157008	0.004												Kidney
db98d6d5-94a5-4559-8f29-49eb74f83ce3	0.001045764	0	cant_be_determined											CNS
db9ce6c6-529c-4da6-92c4-f4f3fc3fe109	0.001199598	0												Lymphoid
dbae3c4e-6d66-483a-a611-7285067bf85c	0.008067788	0.022												Lymphoid
dbfa4e8a-c622-11e3-bf01-24c6515278c0	0.000925043	0												Liver
dc505248-ed04-4f77-a7c6-3fefbc5df27b	0.000357763	0												Lymphoid
dccddb92-bb26-4dc9-a935-2320d089a54a	1.79e-05	0	cant_be_determined											CNS
dd2e7b3c-c622-11e3-bf01-24c6515278c0	0.091370146	0												Liver
dd7d623b-b9af-4147-9aa6-e09793691f10	5.35e-06	0.006												Esophagus
dd8f3e1c-6ed6-41c2-957d-6f679a3cb3ca	2.94e-05	0												Lymphoid
ddb6c68e-0c90-4bde-a011-523600ce8b29	0.000301177	0	cant_be_determined											CNS
de4f520c-c622-11e3-bf01-24c6515278c0	0.000942694	0												Liver
de55876b-5d7d-46e7-bf3e-35db7a155300	3.68e-05	0	cant_be_determined											CNS
de581588-be15-4bf4-95d1-aa5478b53ab6	0.002140901	0												Esophagus
de92d076-24b7-46eb-8df6-56094d264f3b	0.000124335	0	cant_be_determined											CNS
de99a4de-e916-4572-ac9e-73e341827229	2.73e-05	0												Lymphoid
deb0de92-a46b-4e71-814c-2f6c5e97dbcd	0.001700829	0.044												Kidney
deb9fbb6-656b-41ce-8299-554efc2379bd	0.002573849	0.002												Skin
decfb419-63b3-47b0-9dfc-baae180566a0	0.003439875	0												Kidney
ded8b673-53df-4038-a375-7cd0fd2a1b9f	0.004233264	0												Esophagus
def5526a-774a-4704-bb24-10c4e713649a	2.26e-05	0	cant_be_determined											Lymphoid
df6b025e-ccb7-4f1a-ba22-1dcf76e6554c	0.035792609	0.642	cant_be_determined											CNS
df814571-57f1-4e55-bc1a-c892c568c4ba	7.58e-05	0												Lymphoid
df9f8c80-c622-11e3-bf01-24c6515278c0	0.005145559	0.058	cant_be_determined											Biliary
e04bcdff-3206-4c25-bae9-09f0222b074a	0.036327291	0												Skin
e053d377-e4f2-4aee-af7d-e61605e0f4f5	0.001953558	0.01												Kidney
e127e9e4-c622-11e3-bf01-24c6515278c0	0.002270716	0												Liver
e1f0c565-6ed3-4e42-bc3e-c7b0003e837a	9.57e-06	0												Lymphoid
e23462f2-cb86-4a3e-8521-221f4bec247c	2.12e-05	0												CNS
e23c591e-c622-11e3-bf01-24c6515278c0	0.000250659	0												Liver
e2b09705-c5c8-48ee-a90e-19648a7bf2cb	5.6e-05	0												Lymphoid
e2b2357c-da6f-4ca3-9c07-a22f0423e8fe	0.000406506	0												Skin
e2e6a409-b64d-463c-ac3b-e7987a3124f0	0.070258064	0.002												Head/neck
e2fa7251-507e-4d76-95a3-a228adc3885a	0.000402332	0.002												Lymphoid
e34bcc5e-c622-11e3-bf01-24c6515278c0	0.052620712	0												Liver
e4fd1b3e-c622-11e3-bf01-24c6515278c0	0.013001383	0												Biliary
e592e8db-b3d1-4ab5-ae0d-de4b5b4c0f1a	0.000265186	0.594	cant_be_determined											CNS
e5c89fcf-cc57-4fad-a138-ea47ee9ea225	0.002750802	0.042												Kidney
e6168db0-d12f-4218-8ab9-bd704201cb2b	0.002058748	0												Lymphoid
e63fac5a-cc48-4ab4-b69d-3f0be6ad684d	0.000971872	0	cant_be_determined											CNS
e64e9f76-c622-11e3-bf01-24c6515278c0	0.013901441	0												Liver
e68bc7b4-b6b1-4807-b52c-7c7a19cdc373	0.017705788	0.64	cant_be_determined											CNS
e75fbf08-c622-11e3-bf01-24c6515278c0	0.052592397	0.002												Liver
e76128b3-8629-4ffd-b02a-e3f0aae8b1a9	0.000127647	0												CNS
e7a0889c-dd8c-4230-9c63-384f1f6ee577	0.000478878	0												Esophagus
e7c90af0-4b03-453e-b44f-e07248415088	0.007909873	0												Biliary
e84e0649-a2e8-4873-9cb6-1aa65601ae3a	3.82e-05	0												Lymphoid
e88397a6-c622-11e3-bf01-24c6515278c0	0.000690955	0.008												Liver
e91ab7da-79a6-4ea0-bc24-7aacb39f7614	0.002593801	0												Esophagus
e9445993-854d-44fc-a063-eacf70222fdf	0.001559351	0												Liver
e98e4e23-a139-4fff-b017-35f3f976eddd	8.29e-05	0												Lymphoid
e99ccc0c-c622-11e3-bf01-24c6515278c0	0.000354873	0												Liver
e9d607e8-41c3-4210-870b-a9ab9b1d1c8c	0.002867919	0												CNS
ea121956-77f5-4da3-ab15-0b825469eafe	0.131466636	0.006												CNS
ea351a5c-2982-4499-b631-c003deff7d33	8.14e-05	0	cant_be_determined											CNS
ea4a5ca7-86f9-47c7-81be-0c2c669a999f	0.000299372	0												Lymphoid
ea7d37ca-0dac-4ae6-ad03-97c6df3d116d	0.009106131	0.622	cant_be_determined											CNS
ea83f4e6-d2fa-481e-9e2f-e0489f3cbc93	0.005303957	0.022	cant_be_determined											CNS
ead1bc2e-42c3-46d9-8f6f-8cb16ba9d2c3	0.002754075	0												Skin
eb1531b0-8af1-4b2b-9192-644cb47101fc	0.000655024	0												Esophagus
eb1792ee-6946-4e0d-bdd1-c924328dba5d	0.011145441	0												Liver
eb18e71d-2a27-4eae-aa27-4b2c0716d2ba	3.27e-05	0												Stomach
eb588266-c622-11e3-bf01-24c6515278c0	0.073496848	0												Liver
eb9a8f12-6451-43cc-95b3-2e86cf704c96	4.58e-05	0												Skin
eba6d269-27f8-4e50-b59a-5d639bdd5cff	4.22e-05	0												Lymphoid
ebc1a26b-9582-4756-acd5-b02d1152319d	0.000215318	0												Lymphoid
ebe0ed67-2d3f-45cd-8f9b-4912595b16a0	0.000691685	0												Lymphoid
ebe80d6c-7513-4f5e-9919-669b6d1fa68c	0.001128103	0												Kidney
ec23a354-e339-4466-9a1b-8e886ef627e6	0.006997297	0												Liver
ec399861-7a56-4ffd-8619-700b6e3a4367	0.000509902	0.006												Biliary
ec5e2990-c622-11e3-bf01-24c6515278c0	0.008869743	0.004												Liver
ed1f5a41-921f-469a-bc04-306a5435e067	0.001232904	0												CNS
ed46bb2e-97e3-4914-a086-de80e00d6ee8	3.2e-05	0.014												CNS
ed52e836-c622-11e3-bf01-24c6515278c0	0.000110342	0												Liver
eda1d8d9-e8f5-46f2-bb16-15d0b10c2cf9	0.076755826	0												Stomach
edc070db-b768-478f-ae75-4c4012bdc3fe	0.003554199	0.064												CNS
ee7b8074-c622-11e3-bf01-24c6515278c0	0.000113944	0												Liver
eeddf701-93f9-4f10-85cb-9dce1760bae8	0.000208308	0												Skin
ef3b454c-b2cf-4f68-a2ab-733620b6714e	4.3e-05	0												Lymphoid
ef76231d-5a21-4bbd-9847-c01be6fe8916	7.62e-07	0.002	cant_be_determined											CNS
effb868c-f905-41a0-ace1-b5e508732534	0.00633019	0.004												Kidney
f047cb85-8f88-45d5-83c3-0416c9f3fff7	2.84e-05	0												Lymphoid
f04aecf0-eb12-4ab9-928e-7bcf201b0b40	2.74e-05	0.048												Lymphoid
f064f762-c622-11e3-bf01-24c6515278c0	0.001645805	0.002												Liver
f075dcdb-4b6a-4186-bfc5-c1787c4a14ac	5.03e-05	0												Lymphoid
f0768c67-f38c-40a8-8f27-81a927fb5dca	0.003363915	0.002												Liver
f07b9192-c86f-4ee4-a3b5-feb9c5098bf4	0.000243466	0												Skin
f0a33adc-ea90-46ef-a24a-a8d7e4e15db3	0.001483113	0												Esophagus
f0b46dcd-ce45-4405-8744-8f8b35606b75	0.000127513	0.002	cant_be_determined											CNS
f0e0d978-3e32-4444-a07a-26049b2594e6	0.008335662	0												Biliary
f15989a1-e820-4879-a535-438277acad49	0.000103571	0												CNS
f181848a-c622-11e3-bf01-24c6515278c0	0.547572934	0.004												Liver
f1fdacf3-2bb5-400c-895d-ec7f472fa0d4	2.22e-05	0												Lymphoid
f21832da-df8b-43d4-9bf4-34ad72b1bcd9	0.035343276	0.642	cant_be_determined											CNS
f221c897-6ad0-0df9-e040-11ac0c4813ef	0.001190261	0												Bone/Soft tissue
f24688a9-7952-49d8-ba80-2bbad472379c	0.000595365	0												Skin
f266899a-1dab-4226-a965-bc1327c64080	0.000510219	0												Lymphoid
f269134a-e3d5-4020-bcf5-01fb42f914b2	0.000259009	0												Kidney
f2b2111c-c622-11e3-bf01-24c6515278c0	0.058885838	0.03												Biliary
f2c08ac1-4755-4c36-a11d-338d8df9fa0d	0.001180065	0												Lymphoid
f2d18ad2-2f18-4c1d-8b35-46f999a82f30	3.18e-05	0	cant_be_determined											CNS
f2e639cc-c30c-459f-8afc-7ace7d0209c5	0.00220943	0												Esophagus
f35f7712-d5c6-47f6-98ed-704edbbc1e19	0.080355539	0.004												Head/neck
f37971bd-ec65-4840-8d4f-678692cee695	0.003791159	0.006												Kidney
f37de4fa-52f6-4fe4-a3fa-41803032c93f	0.001100412	0												Esophagus
f4025b40-a249-487f-8e93-7a140bcf57c1	0.00638327	0												Liver
f410b432-c622-11e3-bf01-24c6515278c0	0.010008696	0.004												Liver
f4798483-9e32-4e6a-8bb5-6f45af2a8ac5	1.84e-05	0.002	cant_be_determined											CNS
f48c3c82-bebe-4b8e-909e-e1a51a7142ec	3.55e-05	0												Esophagus
f4baf913-c4ac-46f3-83b6-306b9182207d	0.016787599	0.012												Kidney
f4f48342-c622-11e3-bf01-24c6515278c0	0.001542523	0												Liver
f50fb278-1f0f-406e-b341-eb3d1b97afe6	0.000295443	0												Stomach
f54d6b6f-3bc2-41dd-81d0-74cf9e1e90e9	7.65e-07	0	cant_be_determined											CNS
f5c8f98a-c34a-49e8-a655-d8f29487b55c	7.05e-05	0												Lymphoid
f60007b3-0603-4ad1-8b47-d2d4c4c621e4	1.63e-05	0												Lymphoid
f61e794e-c622-11e3-bf01-24c6515278c0	0.017398014	0.002												Liver
f663ff15-c8d3-4bff-8bf9-bf8e983579e0	0.001328665	0												CNS
f6e758a5-150f-4424-90b7-1c1a34aec9a3	0.001138815	0.002												Kidney
f81693ba-09ee-4201-a389-0ceeda8a4636	0.00180917	0												Skin
f82d213f-9843-28eb-e040-11ac0d483e48	0.000495172	0												Bone/Soft tissue
f82d213f-9ba5-7b6b-e040-11ac0c486882	0.086217907	0.01												Bone/Soft tissue
f82d213f-bc06-5b51-e040-11ac0c48687e	0.017601158	0.058												Bone/Soft tissue
f82d213f-bc99-5b1d-e040-11ac0c486880	0.193990811	0.026												Bone/Soft tissue
f82d213f-caa7-fd59-e040-11ac0d483e46	0.001274545	0												Bone/Soft tissue
f82d2146-70f5-8114-e040-11ac0d483e50	0.002677106	0	cant_be_determined											Bone/Soft tissue
f82d2146-726a-d0e0-e040-11ac0c486888	0.005393042	0.01												Bone/Soft tissue
f83f1eb8-b2c8-c3d6-e040-11ac0c48261e	0.034522819	0.002												Bone/Soft tissue
f83fc777-5416-c3e9-e040-11ac0d482c8e	0.07381937	0.01												Bone/Soft tissue
f8407106-8a96-8f85-e040-11ac0d481656	0.009628219	0												Bone/Soft tissue
f841c488-6b8d-6645-e040-11ac0c481418	0.000116612	0	cant_be_determined											Bone/Soft tissue
f8425828-5b0f-23a8-e040-11ac0d484128	0.00012837	0.002												Bone/Soft tissue
f843ed5c-0336-3d33-e040-11ac0d48478c	0.088625494	0.008												Bone/Soft tissue
f8515e5a-7de3-6be3-e040-11ac0c480d6d	0.000215071	0												Bone/Soft tissue
f85397dc-e6e9-4f54-e040-11ac0d48706c	0.000867374	0												Bone/Soft tissue
f854ae3f-356d-f0ad-e040-11ac0c485dae	0.13835636	0.646	cant_be_determined											Bone/Soft tissue
f8593ac0-9480-22a0-e040-11ac0d48697a	0.227858333	0.038												Bone/Soft tissue
f85add3d-e2e6-31f8-e040-11ac0d48479c	0.004462426	0.004												Bone/Soft tissue
f85ae2b7-cebf-17a2-e040-11ac0c48033a	0.000907742	0.01												Bone/Soft tissue
f860bc4c-f31b-6538-e040-11ac0c48268f	0.035228881	0.482												Bone/Soft tissue
f866123a-9eb0-e856-e040-11ac0c48717e	0.101485615	0.044												Bone/Soft tissue
f86975a2-78a4-ef8c-e040-11ac0c4809da	0.00883608	0.008												Bone/Soft tissue
f86ae246-2492-9785-e040-11ac0d4813b0	0.024059074	0.002												Bone/Soft tissue
f86b6ba2-8f4b-ee53-e040-11ac0d485904	0.000263099	0.004												Bone/Soft tissue
f86b7e84-7040-c751-e040-11ac0c485675	0.005187831	0.004												Bone/Soft tissue
f86e2d80-911b-7a19-e040-11ac0d486900	0.000601763	0												Bone/Soft tissue
f8733b80-c622-11e3-bf01-24c6515278c0	0.015614496	0												Liver
f87348df-7186-4c6b-e040-11ac0c482ba9	0.055045655	0												Bone/Soft tissue
f87cdca1-2c85-49d2-e040-11ac0d485c9d	0.000568442	0												Bone/Soft tissue
f87d7c27-eeef-920e-e040-11ac0d48388d	0.000770048	0												Bone/Soft tissue
f87e94a9-ef37-fcba-e040-11ac0c482332	0.004311822	0												Bone/Soft tissue
f87eb1b5-1712-ca1f-e040-11ac0c483848	0.002694621	0												Bone/Soft tissue
f8809cee-8f81-28f8-e040-11ac0d4873bf	0.004957415	0.01	cant_be_determined											Bone/Soft tissue
f8d89ae2-2c7d-40ae-8d40-34b93b16efc9	0.002133619	0.066												CNS
f8e61a02-6e5e-c8e2-e040-11ac0d481b70	0.000102413	0	cant_be_determined											Myeloid
f8e61a02-909d-a906-e040-11ac0d481b6e	8.8e-06	0	cant_be_determined											Myeloid
f8e61a02-92b1-947e-e040-11ac0d481b68	1.52e-05	0												Myeloid
f8e61a06-42fa-e42c-e040-11ac0d481b72	3.45e-05	0	cant_be_determined											Myeloid
f8f0136b-09ec-d079-e040-11ac0c4842e7	0.000204986	0												Myeloid
f8f07989-2e2e-30f3-e040-11ac0d484490	1.29e-06	0	cant_be_determined											Myeloid
f8f0a423-1a3e-4fcc-e040-11ac0c481cb6	7.23e-05	0	cant_be_determined											Myeloid
f8f61e36-b934-9410-e040-11ac0c4804cc	4.22e-05	0	cant_be_determined											Myeloid
f8fae6e5-93b5-7233-e040-11ac0c4830e7	3.03e-05	0												Myeloid
f8fb791c-08b4-b6e1-e040-11ac0d4868f3	2.76e-05	0												Myeloid
f901353f-fdeb-5a55-e040-11ac0c482e89	6.95e-07	0	cant_be_determined											Myeloid
f901c7f7-891e-8ec1-e040-11ac0c480829	6.95e-07	0	cant_be_determined											Myeloid
f9031d03-def1-24b4-e040-11ac0c486570	5.76e-05	0												Myeloid
f9039bd6-8fa6-37cb-e040-11ac0d486d06	0.00010749	0	cant_be_determined											Myeloid
f90cab09-6797-eccb-e040-11ac0d486aa3	1.09e-05	0												Myeloid
f90d51f8-3bc4-2e66-e040-11ac0d484d19	4.25e-05	0	cant_be_determined											Myeloid
f9116dda-19f4-9e1b-e040-11ac0c4872b8	3.45e-05	0	cant_be_determined											Myeloid
f91ba748-5a05-e738-e040-11ac0c486a08	0.000192797	0	cant_be_determined											Myeloid
f91bde65-233d-2218-e040-11ac0c480a33	6.76e-05	0	cant_be_determined											Myeloid
f920200e-f349-3730-e040-11ac0d4825cc	2.36e-05	0	cant_be_determined											Myeloid
f92268fe-7a92-51e8-e040-11ac0d48733a	2.09e-05	0												Myeloid
f926087f-0bec-1316-e040-11ac0c480a58	0.00056152	0.622	cant_be_determined											Myeloid
f92a78d1-90ff-70c8-e040-11ac0d485eca	1.09e-05	0												Myeloid
f92b8fda-350b-17d5-e040-11ac0c480ce8	0.002686831	0.018	cant_be_determined											Myeloid
f92fde51-6a19-6641-e040-11ac0c484074	6.95e-07	0	cant_be_determined											Myeloid
f938b6f4-a457-c624-e040-11ac0c486fad	2.55e-06	0	cant_be_determined											Myeloid
f93abbbf-5e13-9b85-e040-11ac0d485718	0.000226834	0	cant_be_determined											Myeloid
f93f4445-6f19-403c-e040-11ac0d48556f	9.27e-06	0	cant_be_determined											Myeloid
f940cea2-7e79-e422-e040-11ac0d483224	1.29e-06	0	cant_be_determined											Myeloid
f9718c44-c622-11e3-bf01-24c6515278c0	0.026428028	0												Liver
f9837a56-7244-4846-a63d-266e6a92f168	0.025776408	0												Lymphoid
f9a81200-5381-496a-8062-099f9e793618	0.005342358	0.002												Kidney
f9dc999f-6dde-448d-9cf1-2897ddcf7b0b	0.00941229	0.002												Lymphoid
fa718a69-7d09-424b-90a3-4839ba7dc9b2	0.000314728	0.002	cant_be_determined											Myeloid
fa9996c3-b874-4424-a5a6-f1c7c0f42b9b	6.94e-05	0.008												Lymphoid
fab0be4b-c84a-45cd-a76f-44d9a8bf1846	0.002134986	0												Esophagus
fabf1f6c-c622-11e3-bf01-24c6515278c0	0.043523952	0.002												Liver
fb74cca4-ac9c-4be0-80e3-e71592f96aae	0.001214915	0												Lymphoid
fbd899a0-c622-11e3-bf01-24c6515278c0	0.036404304	0.008												Liver
fc009c3d-66fc-4b9c-ae43-014607e3723a	0.000291429	0.004												Skin
fc876f51-0577-3b53-e040-11ac0d48515e	3.04e-05	0												Bone/Soft tissue
fc876f5c-8339-bc9c-e040-11ac0d485160	2.87e-05	0.006	cant_be_determined											Bone/Soft tissue
fc93369d-3ffb-1b53-e040-11ac0c4852ba	1.11e-05	0	cant_be_determined											Bone/Soft tissue
fc93bd81-a3f9-2f8e-e040-11ac0d48306f	2.68e-05	0	cant_be_determined											Bone/Soft tissue
fc9404ed-1ba3-2638-e040-11ac0c484da2	0.001760804	0.038	cant_be_determined											Bone/Soft tissue
fc94ea15-2d98-0c5b-e040-11ac0c48569b	1.37e-05	0.052	cant_be_determined											Bone/Soft tissue
fc94ec40-2cf2-7ce8-e040-11ac0d4871fb	0.000250987	0	cant_be_determined											Bone/Soft tissue
fc9500f3-e7d0-9820-e040-11ac0c48617e	0.002903332	0.046	cant_be_determined											Bone/Soft tissue
fc950c33-faa4-0241-e040-11ac0c486786	0.000196531	0	cant_be_determined											Bone/Soft tissue
fc95d5ce-6899-62f1-e040-11ac0c486011	0.004225753	0.016												Bone/Soft tissue
fc962061-8ab0-42b3-e040-11ac0c4810cc	0.143839517	0												Bone/Soft tissue
fc9650a1-9aef-ab3b-e040-11ac0c4829a7	0.002991547	0												Bone/Soft tissue
fc968a86-32e3-ee88-e040-11ac0d487adb	0.020604818	0.028												Bone/Soft tissue
fc969f27-bdc6-cd03-e040-11ac0c48577e	0.000640715	0												Bone/Soft tissue
fc96e36c-67f1-4c02-e040-11ac0d48393d	3.59e-05	0.026												Bone/Soft tissue
fc975588-6e70-b496-e040-11ac0c484689	3.16e-05	0												Bone/Soft tissue
fc97c1c5-9f4a-be90-e040-11ac0c480992	0.000981439	0												Bone/Soft tissue
fc990cee-3a1e-9d45-e040-11ac0c484ab3	0.000183253	0	cant_be_determined											Bone/Soft tissue
fc99832e-a4ae-8259-e040-11ac0c48131c	0.000457518	0	cant_be_determined											Bone/Soft tissue
fccb865d-83ed-4bfe-ad84-0689813ae977	0.002950631	0												CNS
fce8d8c6-f2a0-43a8-9a7a-b9c519a6686c	0.004738638	0												Lymphoid
fdf7dfb7-9285-46b3-be60-672164507705	7.59e-05	0.002												Lymphoid
fdf9a814-c622-11e3-bf01-24c6515278c0	0.004077138	0												Liver
fe4611c2-bd37-4605-adfe-60efe0392b03	0.000303804	0.262	cant_be_determined											CNS
fec30898-f86b-4207-aa78-de77142c8f50	0.000667389	0.082												Kidney
ffa976f0-aa60-4867-842e-361afa7d68ac	2.18e-05	0												Lymphoid
ffad9288-c622-11e3-bf01-24c6515278c0	0.419671525	0												Liver
